# **Ferroptosis is programmed by the coordinated regulation of glutathione and iron metabolism by BACH1**

Hironari Nishizawa<sup>1</sup>, Mitsuyo Matsumoto<sup>1, 2</sup>, Tomohiko Shindo<sup>3</sup>, Daisuke Saigusa<sup>4</sup>, Hiroki Kato<sup>1</sup>, Katsushi Suzuki<sup>1</sup>, Masaki Sato<sup>1</sup>, Yusho Ishii<sup>1</sup>, Hiroaki Shimokawa<sup>3</sup>, and Kazuhiko Igarashi<sup>1, 2 \*</sup>

**Running title:** *BACH1 accelerates ferroptosis*

The final character count is 35663

From <sup>1</sup>Department of Biochemistry, <sup>2</sup>Center for Regulatory Epigenome and Diseases, and <sup>3</sup>Department of Cardiovascular Medicine, Tohoku University Graduate School of Medicine, Seiryomachi 2-1, Sendai 980-8575, Japan.

<sup>4</sup>Department of Integrative Genomics, Tohoku Medical Megabank Organization, Seiryomachi 2-1, Sendai 980-8575, Japan.

\* To whom correspondence should be addressed: Department of Biochemistry, Tohoku University Graduate School of Medicine, Seiryomachi 2-1, Sendai 980-8575, Japan. Tel.: +81-22-717-7596; Fax: +81-22-717-7598; E-mail: [igarashi@med.tohoku.ac.jp](mailto:igarashi@med.tohoku.ac.jp)

## 1 **Abstract**

2 Ferroptosis is an iron-dependent programmed cell death resulting from alterations of  
3 metabolic processes. However, its regulation and physiological significance remain to be  
4 elucidated. By analyzing transcriptional responses of murine embryonic fibroblasts  
5 exposed to the ferroptosis-inducer erastin, we found that a set of genes related to oxidative  
6 stress protection was induced upon ferroptosis. We further showed that the transcription  
7 factor BACH1 promoted ferroptosis by repressing the expression of a subset of  
8 erastin-inducible genes involved in the synthesis of glutathione or metabolism of  
9 intracellular labile iron, including *Gclm*, *Gclc*, *Slc7a11*, *Hmox1*, *Fth1*, *Ftl1*, and *Slc40a1*.  
10 Compared with wild-type mice, *Bach1*<sup>-/-</sup> mice showed resistance to myocardial infarction,  
11 the seriousness of which was palliated by the iron-chelator deferasirox, which suppressed  
12 ferroptosis. Our findings suggest that ferroptosis is programmed at the transcriptional level  
13 to induce genes combating labile-iron-induced oxidative stress and executed upon  
14 disruption of the balance between the transcriptional induction of protective genes and  
15 accumulation of iron-mediated damage. BACH1 is suggested to control the threshold of  
16 ferroptosis and to be a therapeutic target for palliating myocardial infarction.

17 **Key words:** BACH1/Ferroptosis/Glutathione/Iron/Myocardial infarction

## 1 **Introduction**

2            Ferroptosis is a new form of programmed cell death caused by the iron-dependent  
3 accumulation of lipid hydroperoxide (Dixon et al., 2012, Yang et al., 2014). As a  
4 pathological cell death, ferroptosis causes various oxidative stress-related diseases,  
5 including ischemia-reperfusion injury (Baba et al., 2018, Fang et al., 2019, Gao et al., 2015,  
6 Linkermann et al., 2013, Linkermann et al., 2014) and neurodegenerative diseases (Chiang  
7 et al., 2017, Di Domenico et al., 2017). Ferroptosis also contributes to tumor suppression  
8 as a response induced by p53 and is important for organisms in preventing cancer (Jiang et  
9 al., 2015, Kim et al., 2016, Viswanathan et al., 2017, Yang et al., 2014). Considering the  
10 involvement of lipid hydroperoxide, ferroptosis may be executed at the edge of the  
11 oxidative stress response. Therefore, ferroptosis may be a regulated process involving the  
12 oxidative stress response. However, the regulatory mechanism underlying ferroptosis has  
13 yet to be elucidated in full.

14            BTB and CNC homology 1 (BACH1) is a heme-binding transcription factor  
15 required for the proper regulation of the oxidative stress response and metabolic pathways  
16 related to heme and iron (Ogawa et al., 2001, Sun et al., 2004, Suzuki et al., 2004). BACH1  
17 represses *Hmox1* encoding heme oxygenase-1 (HO-1), *Fth1* and *Ftl1* encoding ferritin

1 proteins, *Gclm* and *Gclc* encoding glutamate-cysteine ligase modifier and catalytic subunits,  
2 and other genes involved in the oxidative stress response (Hintze et al., 2007, Sun et al.,  
3 2002, Warnatz et al., 2011). We hypothesized that BACH1 might regulate ferroptosis by  
4 inhibiting the expression of these genes. In addition, since BACH1 is involved in the  
5 exacerbation of various diseases involving oxidative stress, such as ischemic heart disease  
6 (Yano et al., 2006), hyperoxic lung injury (Ito et al., 2017), trinitrobenzene sulfonic  
7 acid-induced colitis (Harusato et al., 2013), nonalcoholic steatohepatitis (Inoue et al., 2011),  
8 and spinal cord injury (Kanno et al., 2009), BACH1 may exacerbate the severity of these  
9 diseases through ferroptosis.

10 To understand the regulatory mechanism underlying ferroptosis, we analyzed  
11 the transcriptome response in ferroptotic cells with RNA sequencing (RNA-seq). We also  
12 examined whether or not BACH1 was involved in the regulation of ferroptosis by comparing  
13 ferroptosis and the expression of ferroptosis-induced genes between wild-type (WT) and  
14 *Bach1*<sup>-/-</sup> murine embryonic fibroblasts (MEFs). Furthermore, we assessed the influence of  
15 BACH1 and ferroptosis on the severity of acute myocardial infarction (AMI) in model mice.  
16 We found that BACH1 promoted ferroptosis by directly repressing genes involved in the  
17 synthesis of glutathione (GSH) and sequestration of free labile iron. BACH1 also increased

1 the severity of AMI, which was mitigated by the iron chelator deferasirox (DFX). Our  
2 findings highlight the coordinated transcriptional response and its regulation by BACH1  
3 upon ferroptosis.

4

## 5 **Results**

### 6 **Transcriptomic alterations in ferroptotic cells**

7 Changes in metabolic and biological processes occur in ferroptotic cells (Shimada et al.,  
8 2016, Yang et al., 2016). To determine the changes in transcriptome upon ferroptosis, we  
9 treated MEFs with erastin, a class I ferroptosis inducer (Dixon et al., 2012, Yang et al.,  
10 2014), and carried out RNA-seq analyses. Genes related to oxidative stress and iron  
11 metabolism showed significant inductions in their expression (Fig 1A). Some of these  
12 genes are known to possess inhibitory effects on ferroptosis (Stockwell et al., 2017).  
13 Therefore, ferroptosis accompanies the induction of genes that can restrict the execution of  
14 ferroptosis.

15           Among the induced genes, *Hmox1* encoding HO-1 is reported to be associated  
16 with ferroptosis (Kwon et al., 2015, Sun et al., 2016) and is a well-known target of BACH1  
17 (Kitamuro et al., 2003, Sun et al., 2002). *Slc7a11* encodes a component of system  $x_c^-$

1 (cystine/glutamine transporter) (Sato et al., 2005, Sato et al., 2000) and a well-known  
2 regulator of ferroptosis (Jiang et al., 2015). *Gclm* and *Gclc* encode glutamate-cysteine  
3 ligase modifier and catalytic subunits (Fan et al., 2012, Telorack et al., 2016), both  
4 considered to suppress ferroptosis by GSH synthesis (Miess et al., 2018, Stockwell et al.,  
5 2017). These genes for the pathway of GSH synthesis are also considered to be targets of  
6 BACH1 (Warnatz et al., 2011). Indeed, the amount of BACH1 protein was decreased in  
7 MEFs exposed to erastin, which was accompanied by the induction of *Hmox1* (Figs 1B and  
8 EV1). With the reduction in BACH1 protein, the production of its mRNA was induced (Fig  
9 EV1), suggesting the presence of feedback regulation of BACH1.

10           These observations suggest that, when cells are exposed to erastin, the  
11 expression of genes that counteract ferroptosis is induced in part by a reduction in BACH1  
12 protein and that the amount or activity of BACH1 and the kinetics of its feedback regulation  
13 may influence ferroptosis by suppressing this counteracting subprogram of ferroptosis.

14

### 15 **BACH1 promotes ferroptosis**

16 To clarify whether or not BACH1 regulates ferroptosis, we treated WT and *Bach1*<sup>-/-</sup> MEFs  
17 with erastin, stained them with propidium iodide (PI) and annexin V, and compared the cell

1 death by a flow cytometry analysis (Fig EV2). *Bach1*<sup>-/-</sup> MEFs showed less cell death in  
2 response to erastin than WT cells (Fig 2A and B). When the erastin-treated MEFs were  
3 observed with a transmission electron microscope, shrunken mitochondria, which are  
4 characteristic of ferroptosis (Dixon et al., 2012), were confirmed in both WT and *Bach1*<sup>-/-</sup>  
5 MEFs (Fig 2C). The cell death in our experiments was inhibited by the iron chelator  
6 deferoxamine (DFO) (Fig 2D-F), confirming that this death was ferroptosis. These results  
7 showed that BACH1 promoted ferroptosis in MEFs.

8           It should be noted that the difference in cell death between WT and *Bach1*<sup>-/-</sup> MEFs  
9 became smaller as the dose of erastin increased (Fig 2A and B). This may be because  
10 even *Bach1*<sup>-/-</sup> MEFs lost their resistance to ferroptosis under high doses of erastin. This  
11 suggests that the function of BACH1 is more meaningful for restricting ferroptosis under  
12 low-stress conditions. Therefore, the reduction in BACH1 protein may be part of the early  
13 ferroptosis program, and BACH1 may set the threshold for ferroptosis. Execution of  
14 ferroptosis may be determined by the basal amount of BACH1 and how rapidly it is  
15 degraded in response to ferroptosis inducers.

16

17 **BACH1 represses the expression of genes involved in the GSH synthesis pathway**

1 BACH1 may decrease GSH by repressing the expression of genes involved in the pathway  
2 of GSH synthesis. To investigate this possibility, we measured the intracellular GSH  
3 concentrations in WT and *Bach1*<sup>-/-</sup> MEFs. The amount of GSH was significantly higher in  
4 *Bach1*<sup>-/-</sup> MEFs than in WT cells (Fig 3A), suggesting that BACH1 promoted ferroptosis by  
5 reducing GSH within cells.

6 By revisiting our previous data of chromatin immunoprecipitation with sequencing  
7 (ChIP-Seq) of BACH1 in mouse myeloblast M1 cells (Ebina-Shibuya et al., 2017,  
8 Ebina-Shibuya et al., 2016), we found peaks of BACH1 and its partner MAFK in the  
9 regulatory regions of genes encoding molecules for glutathione synthesis, including *Gclm*,  
10 *Gclc*, and *Slc7a11* (Fig 3B). Furthermore, by comparing the expression of these genes in  
11 WT and *Bach1*<sup>-/-</sup> MEFs by quantitative polymerase chain reaction (qPCR), the expression  
12 of all of these genes was confirmed to be higher in *Bach1*<sup>-/-</sup> MEFs than in WT cells (Fig 3C).  
13 These results suggested that BACH1 bound to the regulatory regions of these genes to  
14 repress their expression.

15 A comparison of the protein amounts of SLC7A11, GCLM, and GCLC in MEFs by  
16 Western blotting revealed that more GCLM protein was present in *Bach1*<sup>-/-</sup> MEFs than in  
17 WT cells (Fig 3D and E). Although the amounts of SLC7A11 protein were similar in WT and



1 *Bach1*<sup>-/-</sup> MEFs (Fig 3D), more SLC7A11 protein was present in *Bach1*<sup>-/-</sup> MEFs than in WT  
2 cells when they were treated with proteasome inhibitor MG132 (Fig 3E). These  
3 observations suggest that the amount of SLC7A11 protein is further tuned by  
4 proteasomal-mediated degradation. There were no marked differences in the amount of  
5 GCLC protein with or without MG132 (Fig 3D and E). BACH1 may affect the expression of  
6 GCLC protein under certain circumstances. Given these results, we surmised that BACH1  
7 decreased the amount of GSH in part by repressing the expression of *Gclm* and *Slc7a11*.

8

### 9 **BACH1 promotes ferroptosis by altering GSH**

10 We next examined whether or not the resistance of *Bach1*<sup>-/-</sup> MEFs against ferroptosis was  
11 actually dependent on the increased expression of the genes involved in the GSH  
12 synthesis pathway. Although it is not always statistically significant, knockdown of any of  
13 *Slc7a11*, *Gclm*, and *Gclc* resulted in slight but reproducible increases in ferroptosis in both  
14 WT and *Bach1*<sup>-/-</sup> MEFs (Figs 4A-D and EV3A, B. Appendix Fig S1A-C). These results show  
15 that the genes involved in the GSH synthesis pathway have inhibitory effects against  
16 ferroptosis and suggest that BACH1 promotes ferroptosis by repressing their expression.

17 We next examined the effect of knockdown of *Hmox1*. WT MEFs became more

1 sensitive to ferroptosis by knockdown of *Hmox1* than cells with control knockdown (Figs 4E  
2 and EV3C. Appendix Fig S1D). We thus concluded that HO-1 works as an inhibitor of  
3 ferroptosis under our experimental conditions. However, the effect of HO-1 to accelerate  
4 ferroptosis has also been reported (Fang et al., 2019, Kwon et al., 2015). The function of  
5 HO-1 in ferroptosis might differ depending on the situations of cells.

6           Importantly, knockdown of *Slc7a11*, *Gclm*, *Gclc*, or *Hmox1* did not decrease the  
7 observed differences in ferroptosis between WT and *Bach1*<sup>-/-</sup> MEFs (Figs 4A-E and  
8 EV3A-C. Appendix Fig S1A-D). These results suggest that the role of BACH1 in promoting  
9 ferroptosis depends on the repression of multiple genes involved in ferroptosis.

10

### 11 **BACH1 accelerates ferroptosis by suppressing labile iron metabolism**

12 To explore other target genes of BACH1 in the regulation of ferroptosis, we examined  
13 genes involved in the regulation of iron metabolism (*Fth1*, *Ftl1*, *Slc40a1*, *Tfrc*, *Mfn2*, and  
14 *Fxn*), heavy metal stress (*Mt1*), and lipoperoxidation (*Gpx4*). Some of these genes were  
15 upregulated in response to erastin (see Fig 1A). Among these genes, ferritin genes (*Fth1*  
16 and *Ftl1*) and the ferroportin gene (*Slc40a1*) were dramatically upregulated in *Bach1*<sup>-/-</sup>  
17 MEFs (Fig 5A), and binding peaks of BACH1 and MAFK were observed near their

1 regulatory regions (Fig 5B). In contrast, the expression of *Tfrc*, *Mfn2*, *Fxn*, *Mt1*, and *Gpx4*  
2 was only mildly increased in *Bach1*<sup>-/-</sup> MEFs (Fig EV4A). There were no strong binding  
3 peaks of BACH1 or MAFK in the regulatory regions of these genes (Fig EV4B). Considering  
4 that both ferritin and ferroportin reduce the availability of free labile iron and are known to  
5 inhibit ferroptosis (Geng et al., 2018, Wang et al., 2016), these results suggest that BACH1  
6 promotes ferroptosis by repressing the transcription of ferritin and ferroportin genes. These  
7 findings, along with the regulation of GSH synthesis pathway by BACH1, suggest that  
8 BACH1 accelerates ferroptosis by decreasing the intracellular activity of GSH and  
9 increasing the oxidative activity of labile iron (Fig 5C).

10

### 11 **BACH1 aggravates acute myocardial infarction by promoting ferroptosis**

12 Finally, we tried to examine whether or not the promotion of ferroptosis by BACH1 is  
13 involved in pathological changes *in vivo*. As there are several reports showing that  
14 ferroptosis is involved in ischemia-reperfusion injury in the heart (Baba et al., 2018, Fang et  
15 al., 2019, Gao et al., 2015), we used an AMI model based on left anterior descending  
16 coronary artery (LAD) ligation (Abarbanell et al., 2010, Shindo et al., 2016) (Fig 6A). In this  
17 model, *Bach1*<sup>-/-</sup> mice showed less severe injuries than WT mice as judged by the

1 post-operative survival rate and an evaluation of the cardiac function with  
2 echocardiography (Figs 6B, C and EV5A-C. Movie EV1A-D). The infarct area on  
3 pathological specimens was also smaller in *Bach1*<sup>-/-</sup> mice than in WT mice (Fig 6D and E).  
4 These results suggest that BACH1 exacerbates the pathology of AMI.

5 In order to investigate whether or not ferroptosis is involved in the pathology, we  
6 observed the myocardial infarct regions using a transmission electron microscope.  
7 Shrunken mitochondria were observed in both WT and *Bach1*<sup>-/-</sup> mice (Fig 6F). We then  
8 investigated whether or not the pathological changes could be improved by administering  
9 DFX, which is a clinically used iron chelator. First, we confirmed that it inhibited ferroptosis  
10 in MEFs (Figs 7A and EV5D, E). Although there was no improvement in the survival rates in  
11 WT or *Bach1*<sup>-/-</sup> mice (Fig 7B), an improvement in the cardiac function on echocardiography  
12 was observed in the DFX group, which was more prominent in the WT mice than *Bach1*<sup>-/-</sup>  
13 mice (Figs 7C, D and EV5F-K). The DFX group of WT mice showed a reduction in the  
14 infarct area; however, no such effect was noted in *Bach1*<sup>-/-</sup> mice (Fig 7E and F). These  
15 results suggest that BACH1 exacerbates the pathology of AMI by promoting ferroptosis.

16

## 17 Discussion

1 While genes involved in ferroptosis are being discovered (Stockwell et al., 2017), how their  
2 expression is regulated during ferroptosis remains unclear. In this study, we found that  
3 many of the inhibitory genes of ferroptosis were coordinately upregulated upon induction of  
4 ferroptosis with erastin (Fig 1A). Such a coordinated response may be a mechanism for  
5 restricting ferroptosis. We further showed that BACH1 directly counteracted this  
6 coordinated response of genes, including *Hmox1*, *Slc7a11*, *Gclm*, *Gclc*, *Fth1*, *Ftl1*, and  
7 *Slc40a1* (Figs 3B, C and 5A, B), which are involved in the metabolism of GSH or labile iron.  
8 The protein amount of BACH1 was reduced upon the induction of ferroptosis (Fig 1B).  
9 Bach1 is known to repress the expression of *Slc40a1* in macrophages (Marro et al., 2010).  
10 Therefore, the reduction of BACH1 protein level may trigger the coordinated induction of  
11 these genes as a subprogram of the initial phase of ferroptosis program. Cells can then  
12 integrate distinct signals leading to BACH1 degradation, and thus judge whether or not they  
13 should undergo ferroptosis. Thus, BACH1 sets the threshold for whether or not ferroptosis  
14 occurs in response to lipid peroxide synthesized.

15 NRF2 is known to activate some of the genes that are repressed by BACH1,  
16 including *Hmox1*, *Slc7a11*, *Gclm* and *Gclc* (Alam et al., 1999, Bea et al., 2003, Ishii et al.,  
17 2000, Sasaki et al., 2002, Sekhar et al., 2003, Wild et al., 1999). Even though NRF2

1 increases the intracellular glutathione amount, it only weakly protects cells from ferroptosis  
2 (Cao et al., 2019). Other reports have shown that NRF2 can inhibit ferroptosis (Fan et al.,  
3 2017, Roh et al., 2017, Sun et al., 2016). Therefore, ferroptosis execution may depend on  
4 the initial amounts and kinetics of the induction or reduction of these transcription factors.  
5 This mechanism may extend our understanding of the regulation of ferroptosis, wherein  
6 ferroptosis is a cell death programmed at the level of the gene regulatory network.

7           We showed that GSH was higher in *Bach1*<sup>-/-</sup> MEFs than WT cells (Fig 3A). Our  
8 results strongly suggest that BACH1 decreases intracellular GSH by repressing the  
9 expression of *Gclm*, *Gclc*, and *Slc7a11* (Fig 3B and C). Indeed, the protein amount of  
10 GCLM was higher in *Bach1*<sup>-/-</sup> MEFs than in WT cells (Fig 3D). However, the protein  
11 amounts of GCLC and SLC7A11 were similar between WT and *Bach1*<sup>-/-</sup> MEFs (Fig 3D).  
12 Cells may have additional mechanisms to tune strictly the protein amounts of GCLC and  
13 SLC7A11, managing the intracellular GSH amount and maintaining homeostasis. We found  
14 that SLC7A11 was further regulated by proteosomal degradation (Fig 3E). This observation  
15 suggests that the decision to undergo ferroptosis may be made based upon whether or not  
16 cells can induce efficiently inhibitory proteins like SLC7A11. Cells with higher amounts of  
17 SLC7A11 may likely be protected from ferroptosis. *Gclc* and *Slc7a11* may be critical factors

1 for cells, with the transcriptional regulation by BACH1 and additional layers of regulation,  
2 although these points will need to be explored in further studies.

3 Reports on the function of HO-1 are conflicting, with studies conversely describing  
4 it to promote or inhibit ferroptosis (Adedoyin et al., 2018, Fang et al., 2019, Kwon et al.,  
5 2015, Sun et al., 2016). These discrepant findings may be due to the fact that HO-1  
6 degrades prooxidant heme to produce not only the radical scavengers biliverdin and  
7 bilirubin but also free iron that mediates ferroptosis through Fenton reaction (Igarashi &  
8 Watanabe-Matsui, 2014, Stockwell et al., 2017). Therefore, in order to allow HO-1 to  
9 function effectively as an anti-oxidative stress enzyme, it is essential to suppress the  
10 reactivity of labile iron derived from heme. We showed that BACH1 represses the  
11 expression of the genes of ferritin and ferroportin (Fig 5A and B), which reduce the  
12 intracellular availability of labile iron. By increasing the expression of not only HO-1 but also  
13 ferritin and ferroportin during the induction of ferroptosis (Fig 1A), the prooxidant activities  
14 of heme and heme-derived free iron can be suppressed efficiently, thus protecting cells  
15 from ferroptosis. Conversely, BACH1 represses the expression of ferritin and ferroportin in  
16 addition to HO-1, thus effectively promoting ferroptosis (Fig 5C). Based on the present and  
17 previous findings, we proposed a model in which BACH1 accelerates ferroptosis by

1 suppressing two major intracellular counteracting mechanisms against ferroptosis: the  
2 GSH synthesis pathway and the system for the sequestration of labile iron (Fig 5C).

3 In addition, we showed that ferroptosis was involved in the pathology of not only  
4 ischemia-reperfusion injury (IRI) (Baba et al., 2018, Fang et al., 2019, Gao et al., 2015) but  
5 also AMI. The severity of AMI was improved by the iron chelator, DFX particularly in WT  
6 mice (Fig 7C-F). The peripheral areas of AMI are naturally reperfused by angiogenesis,  
7 where ferroptosis is likely induced. Unexpectedly, DFX did not improve the survival rate.  
8 This may be explained by observations that adhesion between the cardiac infarct area and  
9 chest wall was smaller and cardiac rupture occurred more frequently in the DFX group than  
10 in the control group. These effects may offset the reduction in the infarct areas. Ferroptosis  
11 and subsequent inflammation may prevent cardiac rupture by pleural adhesion, but this  
12 issue needs to be investigated further. Nonetheless, our results here suggest that the  
13 therapeutic effect of DFX is expected in AMI and IRI. Necroptosis is also reportedly  
14 involved in cardiac ischemic disease (Oerlemans et al., 2012, Smith et al., 2007). Therefore,  
15 the double inhibition of ferroptosis and necroptosis may lead to the more effective palliation  
16 of AMI. In addition, this study suggests that *Bach1*<sup>-/-</sup> mice are more resistant to AMI than  
17 WT mice because of their lower rate of ferroptosis than in WT mice (Figs 6 and 7). BACH1



1 may be a potential therapeutic target of AMI in the future.

2           Ferroptosis is thought to play a major role in cancer suppression (Jiang et al.,  
3 2015, Yang et al., 2014). Our results suggest that cancer cells may acquire resistance  
4 against ferroptosis by decreasing BACH1 protein, thus eluding elimination by ferroptosis.  
5 We previously reported that BACH1 promotes the proliferation of MEFs transformed with  
6 H-Ras<sup>v12</sup> and their tumor formation in a mouse transplantation model (Nakanome et al.,  
7 2013). Recently, BACH1 was found to promote the proliferation and/or metastasis of breast  
8 cancer and ovarian cancer cells (Han et al., 2019, Lee et al., 2014, Lee et al., 2019,  
9 Mansoori et al., 2019). BACH1 is therefore considered to have dual functions in cancers:  
10 promoting cell proliferation and cell death through ferroptosis. Cancer cells may adapt to  
11 their surrounding environment by changing the expression of BACH1; cancer cells may  
12 highly express BACH1 during stages of proliferation and metastasis but may reduce their  
13 levels of BACH1 under stress conditions, such as toxicity due to anti-cancer drugs. Such  
14 flexibility in the amount of BACH1 protein expressed may enhance the malignancy of  
15 cancer cells. Therapy that targets this flexibility, such as the down-regulation of BACH1 in  
16 response to erastin, may expand the field of potential cancer treatments .

17

## 1 **Materials and Methods**

### 2 **Mice**

3 The generation of *Bach1*<sup>-/-</sup> mice on the C57BL/6J background was described previously  
4 (Sun et al., 2002). Mice 13 weeks of age were analyzed for models of AMI. Animals were  
5 euthanized by cervical dislocation under anesthetic inhalation overdose with isoflurane  
6 before anatomy. These mice were bred at the animal facility of Tohoku University. Mice  
7 were housed under specific pathogen-free conditions. All experiments performed in this  
8 study were approved by the Institutional Animal Care and Use Committee of the Tohoku  
9 University Environmental & Safety Committee.

10

### 11 **Mice models of AMI**

12 Induction of AMI was performed as described previously (Abarbanell et al., 2010, Shindo et  
13 al., 2016). The mice were subjected to ligation of the proximal left anterior descending  
14 coronary artery (LAD) to induce AMI. They were randomly assigned to sham or AMI group  
15 (Fig 6A), DMSO or DFX group (Fig 7A). In order to follow up the time course of LV function  
16 after AMI, we performed transthoracic two-dimensional echocardiography. For histological  
17 analysis and analysis with transmission electron microscope, the heart was divided along

1 the short axis at the center of the infarct.

2

### 3 **Histopathological Analysis**

4 Excised hearts were fixed with 4% paraformaldehyde for histological and  
5 immunohistochemical examination. After 24-48 hours of fixation and dehydration through  
6 increasing concentrations of ethanol, the tissue specimens were embedded in paraffin and  
7 sliced at 3  $\mu$ m in thickness. The sections were used for Elastica-Masson staining. The  
8 extent of infarct area was calculated as a rate of fibrotic area using the following formula:  
9 fibrotic area / (LV free wall + interventricular septum) x 100 (%) with use of Photoshop  
10 software (Adobe).

11

### 12 **Transmission electron microscopy**

13 Cells and hearts were treated in 2.5% glutaraldehyde in 0.1 M Cacodylate buffer [pH 7.4]  
14 for at least 24 hrs, and washed with 0.1 M Cacodylate buffer 4 times and then treated with  
15 1% OsO<sub>4</sub> in 0.1 M Cacodylate buffer for 90 min. After dehydration through an ethanol  
16 series (50-100% ethanol), cells were embedded in Epon resin. Thin sections were cut with  
17 a microtome (Leica EM UC-7), stained with 2% uranyl acetate and 0.4% lead citrate, and

1 examined and photographed under a transmission electron microscope (Hitachi  
2 High-Technologies H-7600).

3

#### 4 **Isolation and culture of MEFs**

5 MEFs were derived from 13.5-day-old embryos of WT or *Bach1*<sup>-/-</sup> mice. Following removal  
6 of the head and organs, embryos were rinsed with PBS (Nissui, Tokyo, Japan), minced and  
7 digested with trypsin (0.05% (v/v) solution containing 0.53 mM EDTA) (Gibco, Carlsbad, CA,  
8 USA) and 1.8 mg/ml DNase I (Roche, Basel, Switzerland) in PBS and incubated for 60 min  
9 at 37°C. Trypsin was inactivated by addition of DMEM with high glucose (Gibco) containing  
10 10% (v/v) fetal bovine serum (FBS) (Sigma-Aldrich, St. Louis, MO, USA), 1x MEM  
11 nonessential amino acids (Gibco), and 0.1 mM 2-mercaptoethanol (Sigma-Aldrich)). MEFs  
12 from a single embryo were plated into a 100-mm diameter culture dish and incubated at  
13 37°C in 3% oxygen (1st passage : P1). MEFs from embryos of homosexual littermates  
14 were mixed at 2nd passage (P2) and stocked.

15 MEFs were maintained at 37°C in culture medium (DMEM with (Gibco)  
16 containing 10% FBS (Sigma-Aldrich), 1x MEM nonessential amino acids (Gibco),  
17 penicillin/streptomycin (100 U/ml and 100 µg/ml each) (Gibco) and 0.1 mM

1 2-mercaptoethanol (Sigma-Aldrich)) in 3% oxygen for experiments. The number of passage  
2 were recorded for each rot of MEFs. From 5th to 11th passage MEFs were used for all  
3 experiments.

4

## 5 **Reagents**

6 Erastin, DMSO, and DFO were purchased from Sigma-Aldrich. MG132 was purchased  
7 from Calbiochem (San Diego, CA, USA). DFX was transferred as raw material from  
8 Novartis Pfarma (Basel, Switzerland). S-adenosylmethionine (SAM)  $^{-13}\text{C}_5$ ,  $^{15}\text{N}$  and  
9 Glutathione (GSH)  $^{-13}\text{C}_2$ ,  $^{15}\text{N}$  were purchased from Taiyo Nissan Corp. (Tokyo, Japan) and  
10 used as internal standard (IS) for mass spectrometry. Methanol, acetonitrile and  
11 ammonium hydroxide for mass spectrometry were purchased from Kanto Chemical (Tokyo,  
12 Japan). Ammonium bicarbonate (1 mol/L) for mass spectrometry was purchased from Cell  
13 Science & Technology Inst., Inc. (Miyagi, Japan). Formic acid for mass spectrometry was  
14 purchased from Wako Pure Chemical Industries (Osaka, Japan).

15

## 16 **Sample preparation for UHPLC/MS/MS**

17 MEFs (3-8 x 10<sup>6</sup> cells for each lot) were suspended in 100  $\mu\text{L}$  of methanol containing the

1 internal standards (0.2 µg/mL SAM-13C515N for positive ion mode (Pos) and 1 µg/mL  
2 GSH-13C215N for negative ion mode (Neg)), and were homogenized by mixing for 30 sec  
3 followed by sonication for 10 min. After centrifugation at 16,400 x g for 20 min at 4°C  
4 followed by deproteinization, 3 µL of each extract was analyzed by ultra high-performance  
5 liquid chromatography triple quadrupole mass spectrometry (UHPLC/MS/MS).

6

#### 7 **UHPLC/MS/MS analysis**

8 The UHPLC/MS/MS analysis was performed on an Acquity™ Ultra Performance LC I-class  
9 system (Waters Corp. Milford, UK) interfaced to a Waters Xevo TQ-S MS/MS system  
10 equipped with electrospray ionization (ESI). The MS/MS was performed using the multiple  
11 reaction monitoring (MRM) mode with a scan time of 1 ms for each compound. The  
12 transitions of the precursor ion to the product ion, cone voltage and collision energy are  
13 listed in Appendix Table S1. The other settings are as follows: 3.5 kV (Pos) or 2.5 kV (Neg)  
14 capillary voltage, 30 V cone voltage, 50 V source offset, source temperature at 150°C, 150  
15 L/hr cone gas (N<sub>2</sub>) flow rate, desolvation temperature at 450°C, 1000 L/hr desolvation gas  
16 flow, 0.15 min/mL collision gas flow, 7.00 bar nebulization gas (N<sub>2</sub>) flow. LC separation,  
17 was performed as described before (Saigusa et al., 2016), using a normal-phase column

1 (ZIC-pHILIC; 100 mm × 2.1 mm i.d., 5 µm particle size; Sequant, Darmstadt, Germany) with  
2 a gradient elution using solvent A (10 mmol/L NH<sub>4</sub>HCO<sub>3</sub>, adjusted to pH 9.2 using ammonia  
3 solution) and B (acetonitrile) at 300 µL/min: 99 to 70% B from 0.5 to 4.0 min, 70 to 1% B  
4 from 4.0 to 6.5 min, 1% B for 2.5 min, and 99% B for 9 min until the end of the run. The  
5 oven temperature was 20°C. The data were collected using the MassLynx v4.1 software  
6 (Waters Corp.) and the ratio of the peak area of analyte to the IS was analyzed by Traverse  
7 MS (Reifycs Inc., Tokyo, Japan).

8

## 9 **RNA interference**

10 All siRNAs (siControl : Stealth RNAi<sup>TM</sup> siRNA Negative Control, Med GC, siGclm #1 :  
11 MSS204722, siGclm#3 : MSS204724, siSlc7a11 #1 : MSS218649, siSlc7a11 #2 :  
12 MSS218650, siGclc #2 : MSS204720, siGclc #3 : MSS204721, siHmox1 #1 : MSS247281,  
13 siHmox1 #3 : MSS274857) were obtained from Invitrogen (Carlsbad, CA, USA).  
14 Sequences of the siRNAs are described in Appendix Table S2. 2 × 10<sup>6</sup> cells of MEFs were  
15 transfected with 1.2 nM of siRNAs using Amaxa Nucleofector II (Lonza, Basel, Switzerland)  
16 and MF 1 Nucleofector kit (Lonza) according to the manufactures protocols. After  
17 transfection, MEFs were passaged to dishes or culture plate with culture medium.

1

## 2 **Western Blotting**

3 Cells were trypsinized, pelleted, and washed twice in PBS. Cells were lysed beyond 5 min  
4 in SDS sample buffer (62.5 mM Tris-HCl (pH = 6.8), 1% (v/v) 2-Mercaptoethanol, 1% (w/v)  
5 Sodium dodecyl sulfate ; SDS, 10% (w/v) Glycerol, 0.02% (w/v) Bromophenol blue; BPB).  
6 Lysates were resolved on 7.5–10% SDS–PAGE gels and transferred to PVDF membranes  
7 (Millipore, Billerica, MA, USA). The antibody for detection of  $\beta$ -actin (sc-1616) was  
8 purchased from Santa Cruz Biotech (Santa Cruz, CA, USA). The antibody for detection of  
9 HO-1 (ADI-SPA-896) was purchased from Enzo life science (New York, NY, USA). The  
10 antibodies for GAPDH (ab8245), Gclc (ab53179), and Gclm (ab124827) were purchased  
11 from Abcam (Cambridge, UK). The antibody for Slc7a11 (119-11215) was purchased by  
12 RayBiotech (Norcross, GA, USA). The antibody for BACH1 was described previously (Sun  
13 et al., 2002).

14

## 15 **Quantitative PCR with reverse transcription**

16 Total RNA was purified with RNeasy plus micro kit or RNeasy plus mini kit (Qiagen, Hilden,  
17 Germany). Complementary DNA was synthesized by a SuperScript III First-Strand



1 Synthesis System (Invitrogen). Quantitative PCR was performed using LightCycler Fast  
2 Start DNA Master SYBR Green I, and LightCycler nano (Roche) or LightCycler 96 (Roche).  
3 mRNA transcript abundance was normalized to that of Actb. Sequences of the qPCR  
4 primers are described in Appendix Table S3.

5

### 6 **Administration of erastin and Cell death assessment by flow cytometry**

7 Before administration of erastin, the medium was exchanged to the experimental medium  
8 (culture medium without 2-mercaptoethanol and penicillin/streptomycin). Erastin was  
9 dissolved in DMSO and administered to experimental medium with DMSO. The  
10 concentration of DMSO was adjusted among each samples. Cell death was assessed 24  
11 hours after administration of erastin. PI and Annexin V staining were used for assessment  
12 of cell death. APC-Annexin V was purchased from Becton, Dickinson and Company (BD)  
13 (Franklin Lakes, NJ, USA). MEFs were stained by APC-Annexin V according to the  
14 manufactures protocols. PI was added to aliquot (1  $\mu$ g/mL) before flow cytometry. The  
15 MEFs were sorted with a FACS Aria II (BD) and analyzed by FlowJo software (Tree Star,  
16 Ashland, OR, USA). MEFs of positive of whether at least Annexin V or PI was assessed as  
17 dead cells. The gating strategy for assessing dead cells (Figs 2B, E, 4B-E, and EV5E) was

1 shown in Fig EV2.

2

### 3 **ChIP-Seq**

4 We used ChIP-seq data of BACH1 and MAFK in M1 cell line from GEO (Gene Expression  
5 Omnibus) data set GSE79139 that deposited for our previous report (Ebina-Shibuya et al.,  
6 2017, Ebina-Shibuya et al., 2016).

7

### 8 **RNA-Seq**

9 Total RNA was purified using an RNeasy plus mini kit (Qiagen). To remove ribosomal RNA  
10 (rRNA), 4 µg of the total RNA was treated with a GeneRead rRNA Depletion kit (Qiagen)  
11 and then with an RNeasy MiniElute kit (Qiagen) for cleanup. For fragmentation, 100 ng of  
12 the rRNA-depleted RNA was incubated at 95°C for 10 min and was purified by a Magnetic  
13 Beads Cleanup Module (Thermo Fisher Scientific, Carlsbad, CA, USA). The libraries were  
14 constructed with an RNA-seq library kit ver. 2 (Thermo Fisher Scientific) on ABI library  
15 builder (Thermo Fisher Scientific), and was barcoded with Ion Xpress RNA-seq BC primer  
16 (Thermo Fisher Scientific). The library fragments with a size range of 100-200 bp were  
17 selected with Agencourt AMPure XP beads (Beckman Coulter, Brea, CA, USA). Templates

1 were prepared on the Ion Chef system using an Ion PI Hi-Q Chef kit (Thermo Fisher  
2 Scientific) and sequencing was performed on an Ion Proton system using with Ion PI Hi-Q  
3 sequencing kit (Thermo Fisher Scientific) the PI v3 chip (Thermo Fisher Scientific). The  
4 sequence data were obtained as fastq files. The sequence data was aligned to reference  
5 hg19 using the RNASeqAnalysis plugin from Ion torrent suite software (Thermo Fisher  
6 Scientific). Mapped reads were counted for each gene using HTSeq v 0.9.1 htseq-count.  
7 The differential expression analysis was performed on edge R v 3.16.5 after removal of low  
8 count lead genes using three biological replicates for each condition (less than 5 leads per  
9 gene in the sample and counts per million mapped reads (CPM) of 1 or less).

10

## 11 **Statistics**

12 For all experiments, differences of data sets were considered statistically significant when  
13 *P*-values were lower than 0.05. Statistical comparisons were performed using the *t*-test in  
14 comparison between the two groups, and one, two, or three way ANOVA followed by  
15 Tukey's test or Tukey-Kramor method in comparison among multiple groups. For the *t*-test,  
16 student's *t*-test was used when the standard deviation (SD) of the groups was not  
17 significantly different by *f*-test. Welch's *t*-test was used when the SD of the groups was

1 significantly different by *f*-test.

2

### 3 **Data Availability**

4 The RNA-seq data has been deposited at the GEO database under accession codes  
5 GSE131444.

6

### 7 **Acknowledgements**

8 We thank members of the Departments of Biochemistry, Tohoku University Graduate  
9 School of Medicine for discussions and support; the Biomedical Research Core of Tohoku  
10 University Graduate School of Medicine for technical support. We thank Novartis for raw  
11 material transfer of DFX for this study. This study was supported in part by Grants-in-Aid  
12 from the Japan Society for the Promotion of Science (19K07680 to M.M. and 15H02506,  
13 24390066, 21249014 and 18H04021 to K.I.) and Agency for Medical Research and  
14 Development (JP15gm0510001 to K.I.).

15

### 16 **Author Contributions**

17 Writing of original draft ; H.N. Conceptualization and methodology ; H.N., M.M and K.I.

1 Major investigation; H.N. Bioinformatics analysis; H.N. and M.M. Advise and support for  
2 mice AMI model ; T.S. and H.S. Supportive investigation; H.K., K.S., M.S., and Y.I.  
3 Investigation of UHPLC/MS/MS; D.S. Review and editing; H.N and K.I. Supervision; K.I.

4

## 5 **Conflicts of interest**

6 The author, Hironari Nishizawa received 1 g of DFX as raw material from Novartis  
7 Pharma for this study. He and the other authors declare no other conflicts of interest.

8

## 1 **References**

- 2 Abarbanell AM, Herrmann JL, Weil BR, Wang Y, Tan J, Moberly SP, Fiege JW, Meldrum DR (2010) Animal  
3 models of myocardial and vascular injury. *J Surg Res* 162: 239-49
- 4 Adedoyin O, Boddu R, Traylor A, Lever JM, Bolisetty S, George JF, Agarwal A (2018) Heme oxygenase-1  
5 mitigates ferroptosis in renal proximal tubule cells. *Am J Physiol Renal Physiol* 314: F702-f714
- 6 Alam J, Stewart D, Touchard C, Boinapally S, Choi AM, Cook JL (1999) Nrf2, a Cap'n'Collar transcription  
7 factor, regulates induction of the heme oxygenase-1 gene. *J Biol Chem* 274: 26071-8
- 8 Baba Y, Higa JK, Shimada BK, Horiuchi KM, Suhara T, Kobayashi M, Woo JD, Aoyagi H, Marh KS, Kitaoka H,  
9 Matsui T (2018) Protective effects of the mechanistic target of rapamycin against excess iron and  
10 ferroptosis in cardiomyocytes. *Am J Physiol Heart Circ Physiol* 314: H659-h668
- 11 Bea F, Hudson FN, Chait A, Kavanagh TJ, Rosenfeld ME (2003) Induction of glutathione synthesis in  
12 macrophages by oxidized low-density lipoproteins is mediated by consensus antioxidant response  
13 elements. *Circ Res* 92: 386-93
- 14 Cao JY, Poddar A, Magtanong L, Lumb JH, Mileur TR, Reid MA, Dovey CM, Wang J, Locasale JW, Stone E,  
15 Cole SPC, Carette JE, Dixon SJ (2019) A Genome-wide Haploid Genetic Screen Identifies  
16 Regulators of Glutathione Abundance and Ferroptosis Sensitivity. *Cell Rep* 26: 1544-1556.e8
- 17 Chiang GC, Mao X, Kang G, Chang E, Pandya S, Vallabhajosula S, Isaacson R, Ravdin LD, Shungu DC  
18 (2017) Relationships among Cortical Glutathione Levels, Brain Amyloidosis, and Memory in Healthy  
19 Older Adults Investigated In Vivo with (1)H-MRS and Pittsburgh Compound-B PET. *AJNR Am J*  
20 *Neuroradiol* 38: 1130-1137
- 21 Di Domenico F, Tramutola A, Butterfield DA (2017) Role of 4-hydroxy-2-nonenal (HNE) in the pathogenesis of  
22 alzheimer disease and other selected age-related neurodegenerative disorders. *Free Radic Biol Med*  
23 111: 253-261
- 24 Dixon SJ, Lemberg KM, Lamprecht MR, Skouta R, Zaitsev EM, Gleason CE, Patel DN, Bauer AJ, Cantley AM,  
25 Yang WS, Morrison B, 3rd, Stockwell BR (2012) Ferroptosis: an iron-dependent form of nonapoptotic  
26 cell death. *Cell* 149: 1060-72
- 27 Ebina-Shibuya R, Matsumoto M, Kuwahara M, Jang KJ, Sugai M, Ito Y, Funayama R, Nakayama K, Sato Y,  
28 Ishii N, Okamura Y, Kinoshita K, Kometani K, Kurosaki T, Muto A, Ichinose M, Yamashita M, Igarashi  
29 K (2017) Inflammatory responses induce an identity crisis of alveolar macrophages, leading to  
30 pulmonary alveolar proteinosis. *J Biol Chem* 292: 18098-18112
- 31 Ebina-Shibuya R, Watanabe-Matsui M, Matsumoto M, Itoh-Nakadai A, Funayama R, Nakayama K, Muto A,  
32 Igarashi K (2016) The double knockout of Bach1 and Bach2 in mice reveals shared compensatory  
33 mechanisms in regulating alveolar macrophage function and lung surfactant homeostasis. *J Biochem*

- 1 160: 333-344
- 2 Fan X, Liu X, Hao S, Wang B, Robinson ML, Monnier VM (2012) The LEGSKO mouse: a mouse model of  
3 age-related nuclear cataract based on genetic suppression of lens glutathione synthesis. *PLoS One*  
4 7: e50832
- 5 Fan Z, Wirth AK, Chen D, Wruck CJ, Rauh M, Buchfelder M, Savaskan N (2017) Nrf2-Keap1 pathway  
6 promotes cell proliferation and diminishes ferroptosis. *Oncogenesis* 6: e371
- 7 Fang X, Wang H, Han D, Xie E, Yang X, Wei J, Gu S, Gao F, Zhu N, Yin X, Cheng Q, Zhang P, Dai W, Chen J,  
8 Yang F, Yang HT, Linkermann A, Gu W, Min J, Wang F (2019) Ferroptosis as a target for protection  
9 against cardiomyopathy. *Proc Natl Acad Sci U S A* 116: 2672-2680
- 10 Gao M, Monian P, Quadri N, Ramasamy R, Jiang X (2015) Glutaminolysis and Transferrin Regulate  
11 Ferroptosis. *Mol Cell* 59: 298-308
- 12 Geng N, Shi BJ, Li SL, Zhong ZY, Li YC, Xua WL, Zhou H, Cai JH (2018) Knockdown of ferroportin  
13 accelerates erastin-induced ferroptosis in neuroblastoma cells. *Eur Rev Med Pharmacol Sci* 22:  
14 3826-3836
- 15 Han W, Zhang Y, Niu C, Guo J, Li J, Wei X, Jia M, Zhi X, Yao L, Meng D (2019) BTB and CNC homology 1  
16 (Bach1) promotes human ovarian cancer cell metastasis by HMGA2-mediated  
17 epithelial-mesenchymal transition. *Cancer Lett* 445: 45-56
- 18 Harusato A, Naito Y, Takagi T, Uchiyama K, Mizushima K, Hirai Y, Higashimura Y, Katada K, Handa O,  
19 Ishikawa T, Yagi N, Kokura S, Ichikawa H, Muto A, Igarashi K, Yoshikawa T (2013) BTB and CNC  
20 homolog 1 (Bach1) deficiency ameliorates TNBS colitis in mice: role of M2 macrophages and heme  
21 oxygenase-1. *Inflamm Bowel Dis* 19: 740-53
- 22 Hintze KJ, Katoh Y, Igarashi K, Theil EC (2007) Bach1 repression of ferritin and thioredoxin reductase1 is  
23 heme-sensitive in cells and in vitro and coordinates expression with heme oxygenase1, beta-globin,  
24 and NADP(H) quinone (oxido) reductase1. *J Biol Chem* 282: 34365-71
- 25 Igarashi K, Watanabe-Matsui M (2014) Wearing red for signaling: the heme-bach axis in heme metabolism,  
26 oxidative stress response and iron immunology. *Tohoku J Exp Med* 232: 229-53
- 27 Inoue M, Tazuma S, Kanno K, Hyogo H, Igarashi K, Chayama K (2011) Bach1 gene ablation reduces  
28 steatohepatitis in mouse MCD diet model. *J Clin Biochem Nutr* 48: 161-6
- 29 Ishii T, Itoh K, Takahashi S, Sato H, Yanagawa T, Katoh Y, Bannai S, Yamamoto M (2000) Transcription factor  
30 Nrf2 coordinately regulates a group of oxidative stress-inducible genes in macrophages. *J Biol Chem*  
31 275: 16023-9
- 32 Ito M, Nagano N, Arai Y, Ogawa R, Kobayashi S, Motojima Y, Go H, Tamura M, Igarashi K, Dennery PA,  
33 Namba F (2017) Genetic ablation of Bach1 gene enhances recovery from hyperoxic lung injury in  
34 newborn mice via transient upregulation of inflammatory genes. *Pediatr Res* 81: 926-931

- 1 Jiang L, Kon N, Li T, Wang SJ, Su T, Hibshoosh H, Baer R, Gu W (2015) Ferroptosis as a p53-mediated  
2 activity during tumour suppression. *Nature* 520: 57-62
- 3 Kanno H, Ozawa H, Dohi Y, Sekiguchi A, Igarashi K, Itoi E (2009) Genetic ablation of transcription repressor  
4 Bach1 reduces neural tissue damage and improves locomotor function after spinal cord injury in mice.  
5 *J Neurotrauma* 26: 31-9
- 6 Kim SE, Zhang L, Ma K, Riegman M, Chen F, Ingold I, Conrad M, Turker MZ, Gao M, Jiang X, Monette S,  
7 Pauliah M, Gonen M, Zanzonico P, Quinn T, Wiesner U, Bradbury MS, Overholtzer M (2016)  
8 Ultrasmall nanoparticles induce ferroptosis in nutrient-deprived cancer cells and suppress tumour  
9 growth. *Nat Nanotechnol* 11: 977-985
- 10 Kitamuro T, Takahashi K, Ogawa K, Uono-Fujimori R, Takeda K, Furuyama K, Nakayama M, Sun J, Fujita H,  
11 Hida W, Hattori T, Shirato K, Igarashi K, Shibahara S (2003) Bach1 functions as a hypoxia-inducible  
12 repressor for the heme oxygenase-1 gene in human cells. *J Biol Chem* 278: 9125-33
- 13 Kwon MY, Park E, Lee SJ, Chung SW (2015) Heme oxygenase-1 accelerates erastin-induced ferroptotic cell  
14 death. *Oncotarget* 6: 24393-403
- 15 Lee J, Lee J, Farquhar KS, Yun J, Frankenberger CA, Bevilacqua E, Yeung K, Kim EJ, Balazsi G, Rosner MR  
16 (2014) Network of mutually repressive metastasis regulators can promote cell heterogeneity and  
17 metastatic transitions. *Proc Natl Acad Sci U S A* 111: E364-73
- 18 Lee J, Yesilkalan AE, Wynne JP, Frankenberger C, Liu J, Yan J, Elbaz M, Rabe DC, Rustandy FD, Tiwari P,  
19 Grossman EA, Hart PC, Kang C, Sanderson SM, Andrade J, Nomura DK, Bonini MG, Locasale JW,  
20 Rosner MR (2019) Effective breast cancer combination therapy targeting BACH1 and mitochondrial  
21 metabolism. *Nature* 568: 254-258
- 22 Linkermann A, Brasen JH, Darding M, Jin MK, Sanz AB, Heller JO, De Zen F, Weinlich R, Ortiz A, Walczak H,  
23 Weinberg JM, Green DR, Kunzendorf U, Krautwald S (2013) Two independent pathways of regulated  
24 necrosis mediate ischemia-reperfusion injury. *Proc Natl Acad Sci U S A* 110: 12024-9
- 25 Linkermann A, Skouta R, Himmerkus N, Mulay SR, Dewitz C, De Zen F, Prokai A, Zuchtriegel G, Krombach F,  
26 Welz PS, Weinlich R, Vanden Berghe T, Vandenabeele P, Pasparakis M, Bleich M, Weinberg JM,  
27 Reichel CA, Brasen JH, Kunzendorf U, Anders HJ et al. (2014) Synchronized renal tubular cell death  
28 involves ferroptosis. *Proc Natl Acad Sci U S A* 111: 16836-41
- 29 Mansoori B, Mohammadi A, Asadzadeh Z, Shirjang S, Minouei M, Abedi Gaballu F, Shajari N, Kazemi T,  
30 Gjerstorff MF, Duijf PHG, Baradaran B (2019) HMGA2 and Bach-1 cooperate to promote breast  
31 cancer cell malignancy. *J Cell Physiol*
- 32 Marro S, Chiabrando D, Messana E, Stolte J, Turco E, Tolosano E, Muckenthaler MU (2010) Heme controls  
33 ferroportin1 (FPN1) transcription involving Bach1, Nrf2 and a MARE/ARE sequence motif at position  
34 -7007 of the FPN1 promoter. *Haematologica* 95: 1261-8



- 1 Miess H, Dankworth B, Gouw AM, Rosenfeldt M, Schmitz W, Jiang M, Saunders B, Howell M, Downward J,  
2 Felsher DW, Peck B, Schulze A (2018) The glutathione redox system is essential to prevent  
3 ferroptosis caused by impaired lipid metabolism in clear cell renal cell carcinoma. *Oncogene*  
4 Nakanome A, Brydun A, Matsumoto M, Ota K, Funayama R, Nakayama K, Ono M, Shiga K, Kobayashi T,  
5 Igarashi K (2013) Bach1 is critical for the transformation of mouse embryonic fibroblasts by Ras(V12)  
6 and maintains ERK signaling. *Oncogene* 32: 3231-45  
7 Oerlemans MI, Liu J, Arslan F, den Ouden K, van Middelaar BJ, Doevendans PA, Sluijter JP (2012) Inhibition  
8 of RIP1-dependent necrosis prevents adverse cardiac remodeling after myocardial  
9 ischemia-reperfusion in vivo. *Basic Res Cardiol* 107: 270  
10 Ogawa K, Sun J, Taketani S, Nakajima O, Nishitani C, Sassa S, Hayashi N, Yamamoto M, Shibahara S, Fujita  
11 H, Igarashi K (2001) Heme mediates derepression of Maf recognition element through direct binding  
12 to transcription repressor Bach1. *Embo j* 20: 2835-43  
13 Roh JL, Kim EH, Jang H, Shin D (2017) Nrf2 inhibition reverses the resistance of cisplatin-resistant head and  
14 neck cancer cells to artesunate-induced ferroptosis. *Redox Biol* 11: 254-262  
15 Saigusa D, Okamura Y, Motoike IN, Katoh Y, Kurosawa Y, Saijyo R, Koshiha S, Yasuda J, Motohashi H,  
16 Sugawara J, Tanabe O, Kinoshita K, Yamamoto M (2016) Establishment of Protocols for Global  
17 Metabolomics by LC-MS for Biomarker Discovery. *PLoS One* 11: e0160555  
18 Sasaki H, Sato H, Kuriyama-Matsumura K, Sato K, Maebara K, Wang H, Tamba M, Itoh K, Yamamoto M,  
19 Bannai S (2002) Electrophile response element-mediated induction of the cystine/glutamate  
20 exchange transporter gene expression. *J Biol Chem* 277: 44765-71  
21 Sato H, Shiiya A, Kimata M, Maebara K, Tamba M, Sakakura Y, Makino N, Sugiyama F, Yagami K, Moriguchi  
22 T, Takahashi S, Bannai S (2005) Redox imbalance in cystine/glutamate transporter-deficient mice. *J*  
23 *Biol Chem* 280: 37423-9  
24 Sato H, Tamba M, Kuriyama-Matsumura K, Okuno S, Bannai S (2000) Molecular cloning and expression of  
25 human xCT, the light chain of amino acid transport system xc. *Antioxid Redox Signal* 2: 665-71  
26 Sekhar KR, Crooks PA, Sonar VN, Friedman DB, Chan JY, Meredith MJ, Starnes JH, Kelton KR, Summar SR,  
27 Sasi S, Freeman ML (2003) NADPH oxidase activity is essential for Keap1/Nrf2-mediated induction of  
28 GCLC in response to 2-indol-3-yl-methylenequinclidin-3-ols. *Cancer Res* 63: 5636-45  
29 Shimada K, Skouta R, Kaplan A, Yang WS, Hayano M, Dixon SJ, Brown LM, Valenzuela CA, Wolpaw AJ,  
30 Stockwell BR (2016) Global survey of cell death mechanisms reveals metabolic regulation of  
31 ferroptosis. *Nat Chem Biol* 12: 497-503  
32 Shindo T, Ito K, Ogata T, Hatanaka K, Kurosawa R, Eguchi K, Kagaya Y, Hanawa K, Aizawa K, Shiroto T,  
33 Kasukabe S, Miyata S, Taki H, Hasegawa H, Kanai H, Shimokawa H (2016) Low-Intensity Pulsed  
34 Ultrasound Enhances Angiogenesis and Ameliorates Left Ventricular Dysfunction in a Mouse Model

- 1 of Acute Myocardial Infarction. *Arterioscler Thromb Vasc Biol* 36: 1220-9
- 2 Smith CC, Davidson SM, Lim SY, Simpkin JC, Hothersall JS, Yellon DM (2007) Necrostatin: a potentially  
3 novel cardioprotective agent? *Cardiovasc Drugs Ther* 21: 227-33
- 4 Stockwell BR, Friedmann Angeli JP, Bayir H, Bush AI, Conrad M, Dixon SJ, Fulda S, Gascon S, Hatzios SK,  
5 Kagan VE, Noel K, Jiang X, Linkermann A, Murphy ME, Overholtzer M, Oyagi A, Pagnussat GC, Park  
6 J, Ran Q, Rosenfeld CS et al. (2017) Ferroptosis: A Regulated Cell Death Nexus Linking Metabolism,  
7 Redox Biology, and Disease. *Cell* 171: 273-285
- 8 Sun J, Brand M, Zenke Y, Tashiro S, Groudine M, Igarashi K (2004) Heme regulates the dynamic exchange of  
9 Bach1 and NF-E2-related factors in the Maf transcription factor network. *Proc Natl Acad Sci U S A*  
10 101: 1461-6
- 11 Sun J, Hoshino H, Takaku K, Nakajima O, Muto A, Suzuki H, Tashiro S, Takahashi S, Shibahara S, Alam J,  
12 Taketo MM, Yamamoto M, Igarashi K (2002) Hemoprotein Bach1 regulates enhancer availability of  
13 heme oxygenase-1 gene. *Embo j* 21: 5216-24
- 14 Sun X, Ou Z, Chen R, Niu X, Chen D, Kang R, Tang D (2016) Activation of the p62-Keap1-NRF2 pathway  
15 protects against ferroptosis in hepatocellular carcinoma cells. *Hepatology* 63: 173-84
- 16 Suzuki H, Tashiro S, Hira S, Sun J, Yamazaki C, Zenke Y, Ikeda-Saito M, Yoshida M, Igarashi K (2004) Heme  
17 regulates gene expression by triggering Crm1-dependent nuclear export of Bach1. *Embo j* 23:  
18 2544-53
- 19 Telorack M, Abplanalp J, Werner S (2016) Low levels of glutathione are sufficient for survival of keratinocytes  
20 after UV irradiation and for healing of mouse skin wounds. *Arch Dermatol Res* 308: 443-8
- 21 Viswanathan VS, Ryan MJ, Dhruv HD, Gill S, Eichhoff OM, Seashore-Ludlow B, Kaffenberger SD, Eaton JK,  
22 Shimada K, Aguirre AJ, Viswanathan SR, Chattopadhyay S, Tamayo P, Yang WS, Rees MG, Chen S,  
23 Boskovic ZV, Javaid S, Huang C, Wu X et al. (2017) Dependency of a therapy-resistant state of  
24 cancer cells on a lipid peroxidase pathway. *Nature* 547: 453-457
- 25 Wang YQ, Chang SY, Wu Q, Gou YJ, Jia L, Cui YM, Yu P, Shi ZH, Wu WS, Gao G, Chang YZ (2016) The  
26 Protective Role of Mitochondrial Ferritin on Erastin-Induced Ferroptosis. *Front Aging Neurosci* 8: 308
- 27 Warnatz HJ, Schmidt D, Manke T, Piccini I, Sultan M, Borodina T, Balzereit D, Wruck W, Soldatov A, Vingron  
28 M, Lehrach H, Yaspo ML (2011) The BTB and CNC homology 1 (BACH1) target genes are involved in  
29 the oxidative stress response and in control of the cell cycle. *J Biol Chem* 286: 23521-32
- 30 Wild AC, Moinova HR, Mulcahy RT (1999) Regulation of gamma-glutamylcysteine synthetase subunit gene  
31 expression by the transcription factor Nrf2. *J Biol Chem* 274: 33627-36
- 32 Yang WS, Kim KJ, Gaschler MM, Patel M, Shchepinov MS, Stockwell BR (2016) Peroxidation of  
33 polyunsaturated fatty acids by lipoxygenases drives ferroptosis. *Proc Natl Acad Sci U S A* 113:  
34 E4966-75

- 1 Yang WS, SriRamaratnam R, Welsch ME, Shimada K, Skouta R, Viswanathan VS, Cheah JH, Clemons PA,  
2 Shamji AF, Clish CB, Brown LM, Girotti AW, Cornish VW, Schreiber SL, Stockwell BR (2014)  
3 Regulation of ferroptotic cancer cell death by GPX4. *Cell* 156: 317-31
- 4 Yano Y, Ozono R, Oishi Y, Kambe M, Yoshizumi M, Ishida T, Omura S, Oshima T, Igarashi K (2006) Genetic  
5 ablation of the transcription repressor Bach1 leads to myocardial protection against  
6 ischemia/reperfusion in mice. *Genes Cells* 11: 791-803

7

8

## 1 **Figure Legends**

### 2 **Figure 1. Regulatory genes of ferroptosis are upregulated with decreasing BACH1** 3 **protein at the induction of ferroptosis.**

4 A RNA-seq was performed in WT MEFs (9th passage: P9) with only DMSO (DMSO  
5 group) or DMSO + 3  $\mu$ M Erastin (Erastin group) for 24 hrs. A heat map of gene  
6 expression profiles shows the genes registered to map04216 (Ferroptosis  
7 pathway) of Kyoto Encyclopedia of Genes and Genomes (KEGG) pathway map.  
8 The genes were arranged from the bottom in the order of fold change of Erastin  
9 group to DMSO group. n = 3 per group.

10 B Western blotting for BACH1, HO-1,  $\beta$ -actin, and GAPDH of WT MEFs (P7, P11)  
11 exposed to erastin for 12 hrs.

12 Data information: In (A), *P*-value by the differential expression analysis performed on edge

13 R.

14

### 15 **Figure 2. BACH1 promotes ferroptosis.**

16 A, B Optical microscope image (A) and Quantification of cell death by flow cytometer  
17 (B) of WT and *Bach1*<sup>-/-</sup> MEFs (11th passage: P11) exposed to erastin for 24 hrs.

1 Scale bars in (A) represent 100  $\mu\text{m}$ .

2 C Transmission electron microscope image of WT and *Bach1*<sup>-/-</sup> MEFs (P9) exposed  
3 to erastin for 10 hrs. Arrow: shrunken mitochondria. Scale bars represent 500 nm.

4 D-F Optical microscope image (D) and Quantification of cell death by flow cytometer  
5 (E,F) of WT and *Bach1*<sup>-/-</sup> MEFs (P12) exposed to erastin and DFO for 24 hrs. (F) is  
6 statistical analysis results of (E). Scale bars in (D) represents 200  $\mu\text{m}$

7 Data information: (A, B, D, and E) are representative of three independent experiments.  
8 Error bars of (B) represent standard deviation. The box and whisker plots of (E) show the  
9 25th and 75th percentile quartiles and median values (center black line) and maximum and  
10 minimum values of the data. *P*-value of (B) by *t*-test. *P*-value of (F) by three-way ANOVA.

11

12 **Figure 3. BACH1 decreases GSH by repressing *Slc7a11*, *Gclm*, and *Gclc* expression.**

13 A Intracellular concentration of GSH in WT and *Bach1*<sup>-/-</sup> MEFs (7th, 9th, and 11th  
14 passage : P7, P9, and P11) by UHPLC/MS/MS.

15 B CHIP-seq analysis of the binding of BACH1, MAFK for gene regions of *Slc7a11*,  
16 *Gclm*, and *Gclc* in M1 cells.

17 C qRT-PCR analysis for *Slc7a11*, *Gclm*, and *Gclc* mRNA relative to *Actb* mRNA in

1 WT and *Bach1*<sup>-/-</sup> MEFs (P7, P9, P11). n = 3 of independent lots of MEFs per  
2 genotype.

3 D Western blotting for BACH1, SLC7A11, GCLM, GCLC, and GAPDH of WT and  
4 *Bach1*<sup>-/-</sup> MEFs (P7, P9, P11).

5 E Western blotting for BACH1, SLC7A11, GCLM, GCLC,  $\beta$ -actin and GAPDH in WT  
6 and *Bach1*<sup>-/-</sup> MEFs (P10) exposed to 25  $\mu$ M MG132.

7 Data information: The box and whisker plots of (A) show the 25th and 75th percentile  
8 quartiles and median values (center black line) and maximum and minimum values of the  
9 data. Error bars of (C) represent standard deviation. *P*-value of (A,C) by *t*-test.

10

11 **Figure 4. *Gclm*, *Slc7a11*, *Gclc*, and *Hmox1* repress ferroptosis.**

12 A-E siRNA was transfected to WT and *Bach1*<sup>-/-</sup> MEFs (5th or 6th passage). After 24 hrs,  
13 MEFs were exposed to erastin for 24 hrs. Optical microscope image (A) and  
14 Quantification of cell death by flow cytometer (B-E). Scale bars in (A) represent  
15 100  $\mu$ m.

16 Data information: Error bars of (B-E) represent standard deviation. *P*-value by Tukey's test  
17 after three-way ANOVA.

1

2 **Figure 5. BACH1 represses transcription of genes of ferritin and ferroportin.**

3 A qRT-PCR analysis for *Fth1*, *Ftl1*, and *Slc40a1* mRNA relative to *Actb* mRNA in WT  
4 and *Bach1*<sup>-/-</sup> MEFs (7th, 9th, and 11th passage : P7, P9, and P11). n = 3 of  
5 independent lots of MEFs per genotype.

6 B ChIP-seq analysis of the binding of BACH1, MAFK for gene regions of *Fth1*, *Ftl1*,  
7 and *Slc40a1* in M1 cells.

8 C Conceptual diagram.

9 Data information: Error bars of (A) represent standard deviation. *P*-value of (A) by *t*-test.

10

11 **Figure 6. BACH1 aggravates AMI.**

12 A Experimental process.

13 B Kaplan-Meier curve of each group.

14 C Left ventricular fractional shortening (LVFS) on echocardiogram.

15 D, E Mice was dissected after 9 weeks from operation. Representative photographs of  
16 heart sections stained with Elastica Masson staining (D). Infarct size to left  
17 ventricular section (E). Scale bars in (D) represent 2 mm.

1 F Mice was dissected next day from operation. Transmission electron microscope  
2 image of normal and infarct area of hearts of mice next day from operation.  
3 Orange arrow: normal mitochondria. Yellow arrow: shrunken mitochondria. Scale  
4 bars represent 500 nm.

5 Data information: Error bars of (C) represent standard deviation. The box and whisker plots  
6 of (E) show the 25th and 75th percentile quartiles and median values (center black line)  
7 and maximum and minimum values of the data. *P*-value of (B) by Log-rank test between  
8 WT (AMI) and *Bach1*<sup>-/-</sup> (AMI). *P*-value of (C) by Tukey-Kramer method after two-way  
9 ANOVA. *P*-value of (E) by *t*-test.

10

11 **Figure 7. An iron chelator DFX alleviates AMI.**

12 A Experimental process.

13 B Kaplan-Meier curve of each group.

14 C, D Left ventricular fractional shortening (LVFS) of WT mice (C) and *Bach1*<sup>-/-</sup> mice (D)  
15 on echocardiogram.

16 E, F Mice was dissected after 9 weeks from operation. Representative photographs of  
17 heart sections stained with Elastica Masson staining (E). Infarct size to left



1           ventricular section (F). Scale bars in (E) represent 2 mm.

2   Data information: Error bars of (C, D) represent standard deviation. The box and whisker  
3   plots of (F) show the 25th and 75th percentile quartiles and median values (center black  
4   line) and maximum and minimum values of the data. *P*-value of (C, D, F) by *t*-test.

5

6   **Expanded View Figure 1. Transcription of *Bach1* and *Hmox1* increases in response**  
7   **to erastin.**

8   WT MEFs (7th, 9th, and 11th passage : P7, P9, and P11) were exposed to erastin for 10  
9   hrs. qRT-PCR analysis for *Bach1* and *Hmox1* mRNA relative to *Actb* mRNA.

10   Data information: Error bars represent standard deviation. *P*-value by Tukey's test after  
11   one-way ANOVA.

12

13   **Expanded View Figure 2. Additional data demonstrating flow cytometry gating of**  
14   **dead cells in WT and *Bach1*<sup>-/-</sup> MEFs exposed to erastin.**

15   WT and *Bach1*<sup>-/-</sup> MEFs (11th passage: P11) exposed to erastin for 24 hrs (Figure 2B).  
16   Representative flow cytometry images showing the strategy that was implemented for the  
17   sorting of dead cells. Propidium iodide (PI) positive or Annexin V positive cells were judged

1 as dead cells. The similar strategy was implemented in Figs 2E, 4B-E, and EV5E.

2

3 **Expanded View Figure 3. *Slc7a11*, *Gclc*, and *Hmox1* repress ferroptosis, associated**  
4 **with Fig 4.**

5 A-C siRNA was transfected to WT and *Bach1*<sup>-/-</sup> MEFs (5th or 6th passage). After 24 hrs,  
6 MEFs were exposed to erastin for 24 hrs. Optical microscope image. Scale bars  
7 represent 100 μm.

8

9 **Expanded View Figure 4. *Tfrc*, *Mfn2*, *Fxn*, *Mt1*, and *Gpx4* were not strongly regulated**  
10 **by BACH1.**

11 A qRT-PCR analysis for *Tfrc*, *Mfn2*, *Fxn*, *Mt1*, and *Gpx4* mRNA relative to *Actb*  
12 mRNA in WT and *Bach1*<sup>-/-</sup> MEFs (7th, 9th, and 11th passage : P7, P9, and P11).

13 B CHIP-seq analysis of the binding of BACH1, MAFK for gene regions of *Tfrc*, *Mfn2*,  
14 *Fxn*, *Mt1*, and *Gpx4* in M1 cells.

15 Data information: Error bars of (A) represent standard deviation. *P*-value of (A) by *t*-test.

16

17 **Expanded View Figure 5. BACH1 aggravates AMI, that was alleviated by an iron**

1 **chelator DFX.**

2 A-C Left ventricular ejection fraction (LVEF) (A), left ventricular internal dimension in  
3 diastole (LVIDd) (B), and left ventricular internal dimension in systole (LVIDs) (C)  
4 on echocardiogram.

5 D, E Optical microscope image (D) and Quantification of cell death by flow cytometer (E)  
6 of WT and *Bach1*<sup>-/-</sup> MEFs (10th passage: P10) exposed to erastin for 24 hrs. Scale  
7 bars in (D) represent 100  $\mu$ m.

8 (F-K) Left ventricular ejection fraction (LVEF) (F, I), left ventricular internal dimension in  
9 diastole (LVIDd) (G, J), and left ventricular internal dimension in systole (LVIDs) (H,  
10 K) on echocardiogram.

11 Data information: Error bars of (A-C, E-K) represent standard deviation. *P*-value of (A-C) by  
12 Tukey-Kramer method after two-way ANOVA. *P*-value of (E) by Tukey's test after two-way  
13 ANOVA. *P*-value of (F-K) by *t*-test.

14

**A** bioRxiv preprint doi: <https://doi.org/10.1101/644898>; this version posted May 21, 2019. The copyright holder for this preprint (which was not certified by peer review) is the author/funder. All rights reserved. No reuse allowed without permission.

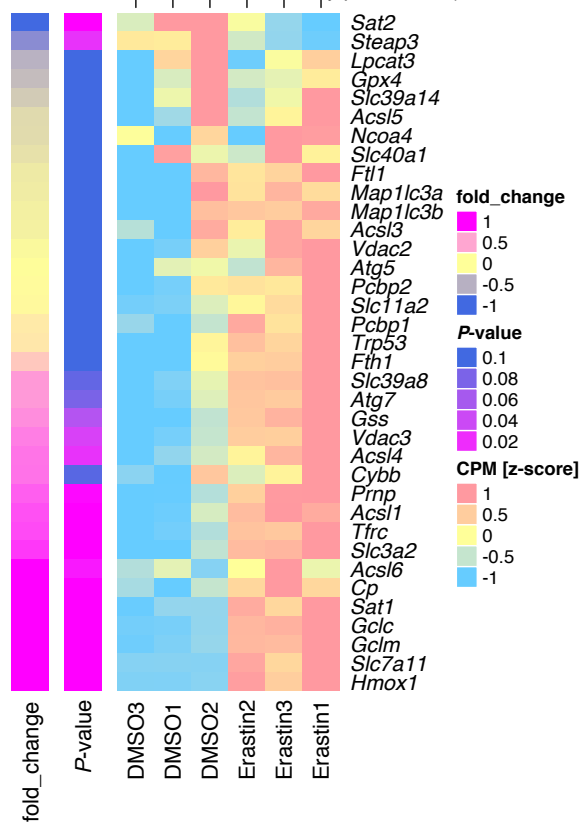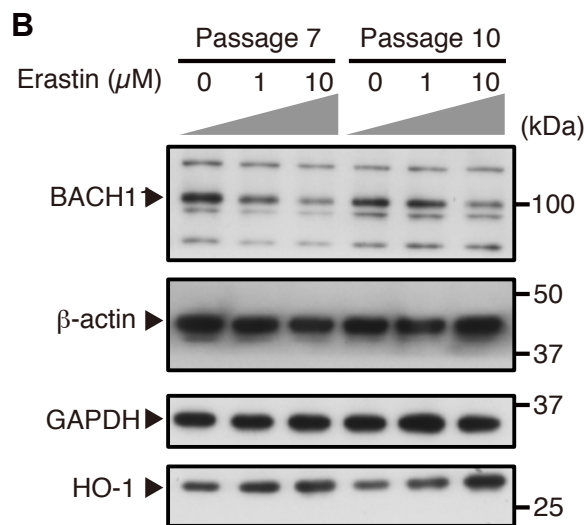

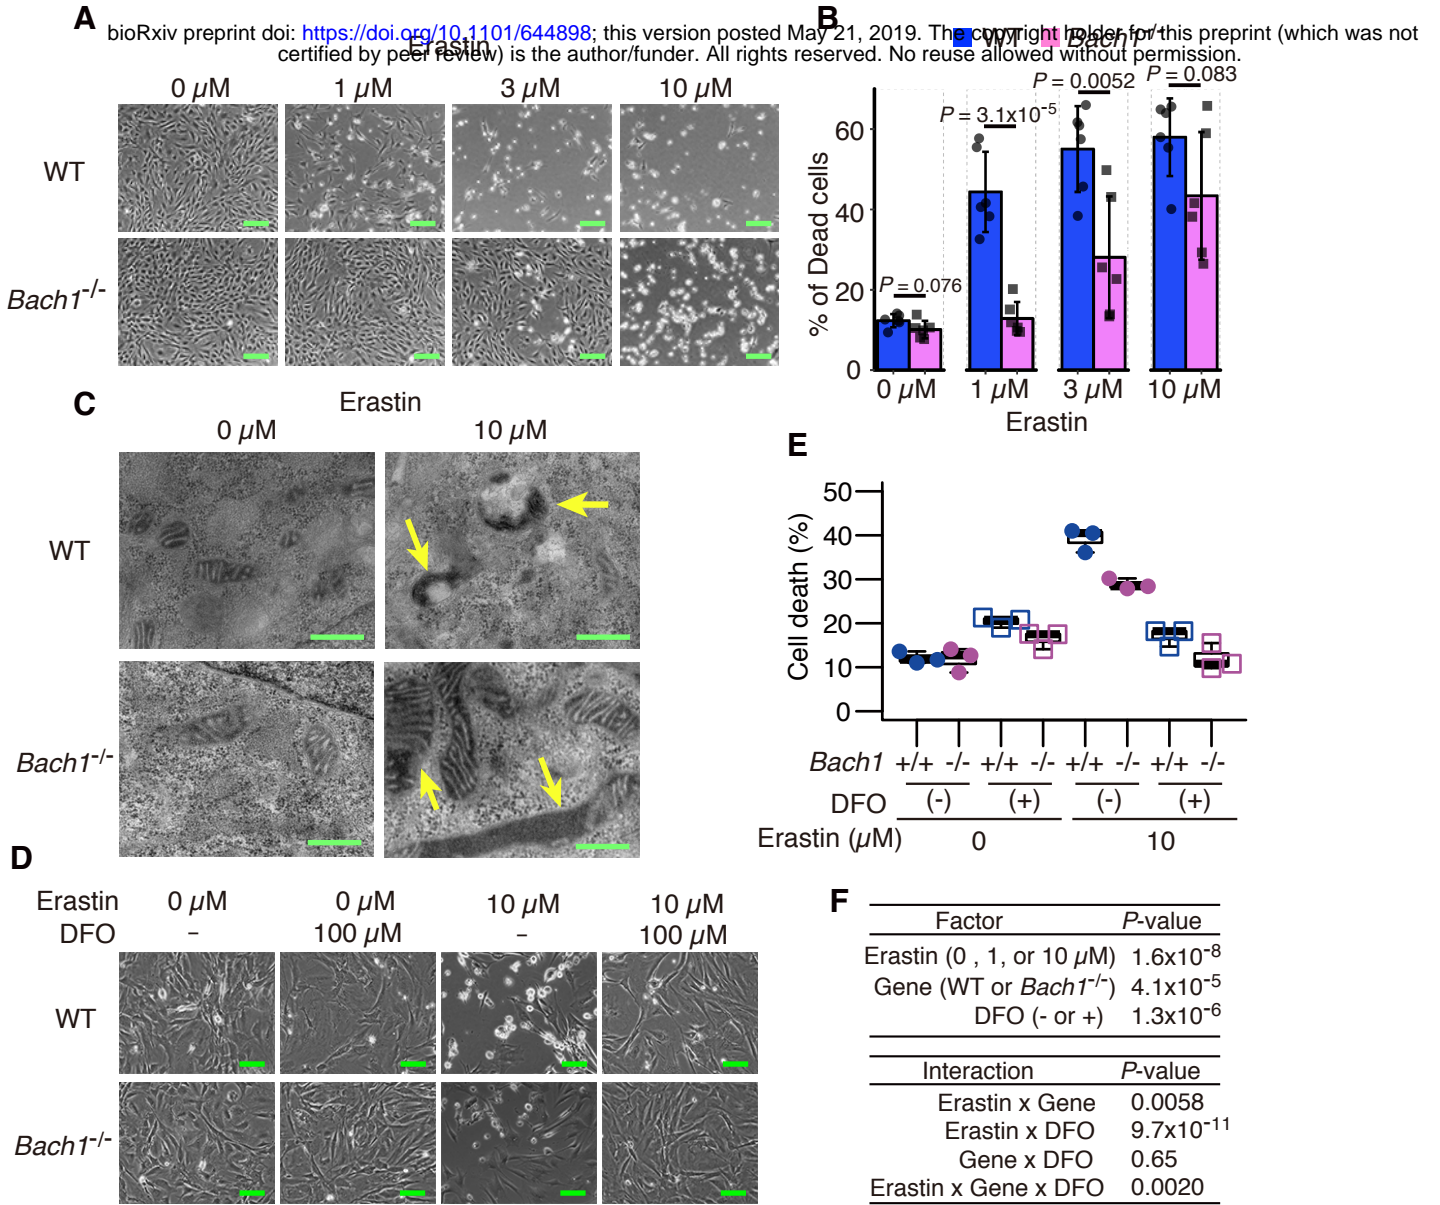

bioRxiv preprint doi: <https://doi.org/10.1101/644898>; this version posted May 21, 2019. The copyright holder for this preprint (which was not certified by peer review) is the author/funder. All rights reserved. No reuse allowed without permission.

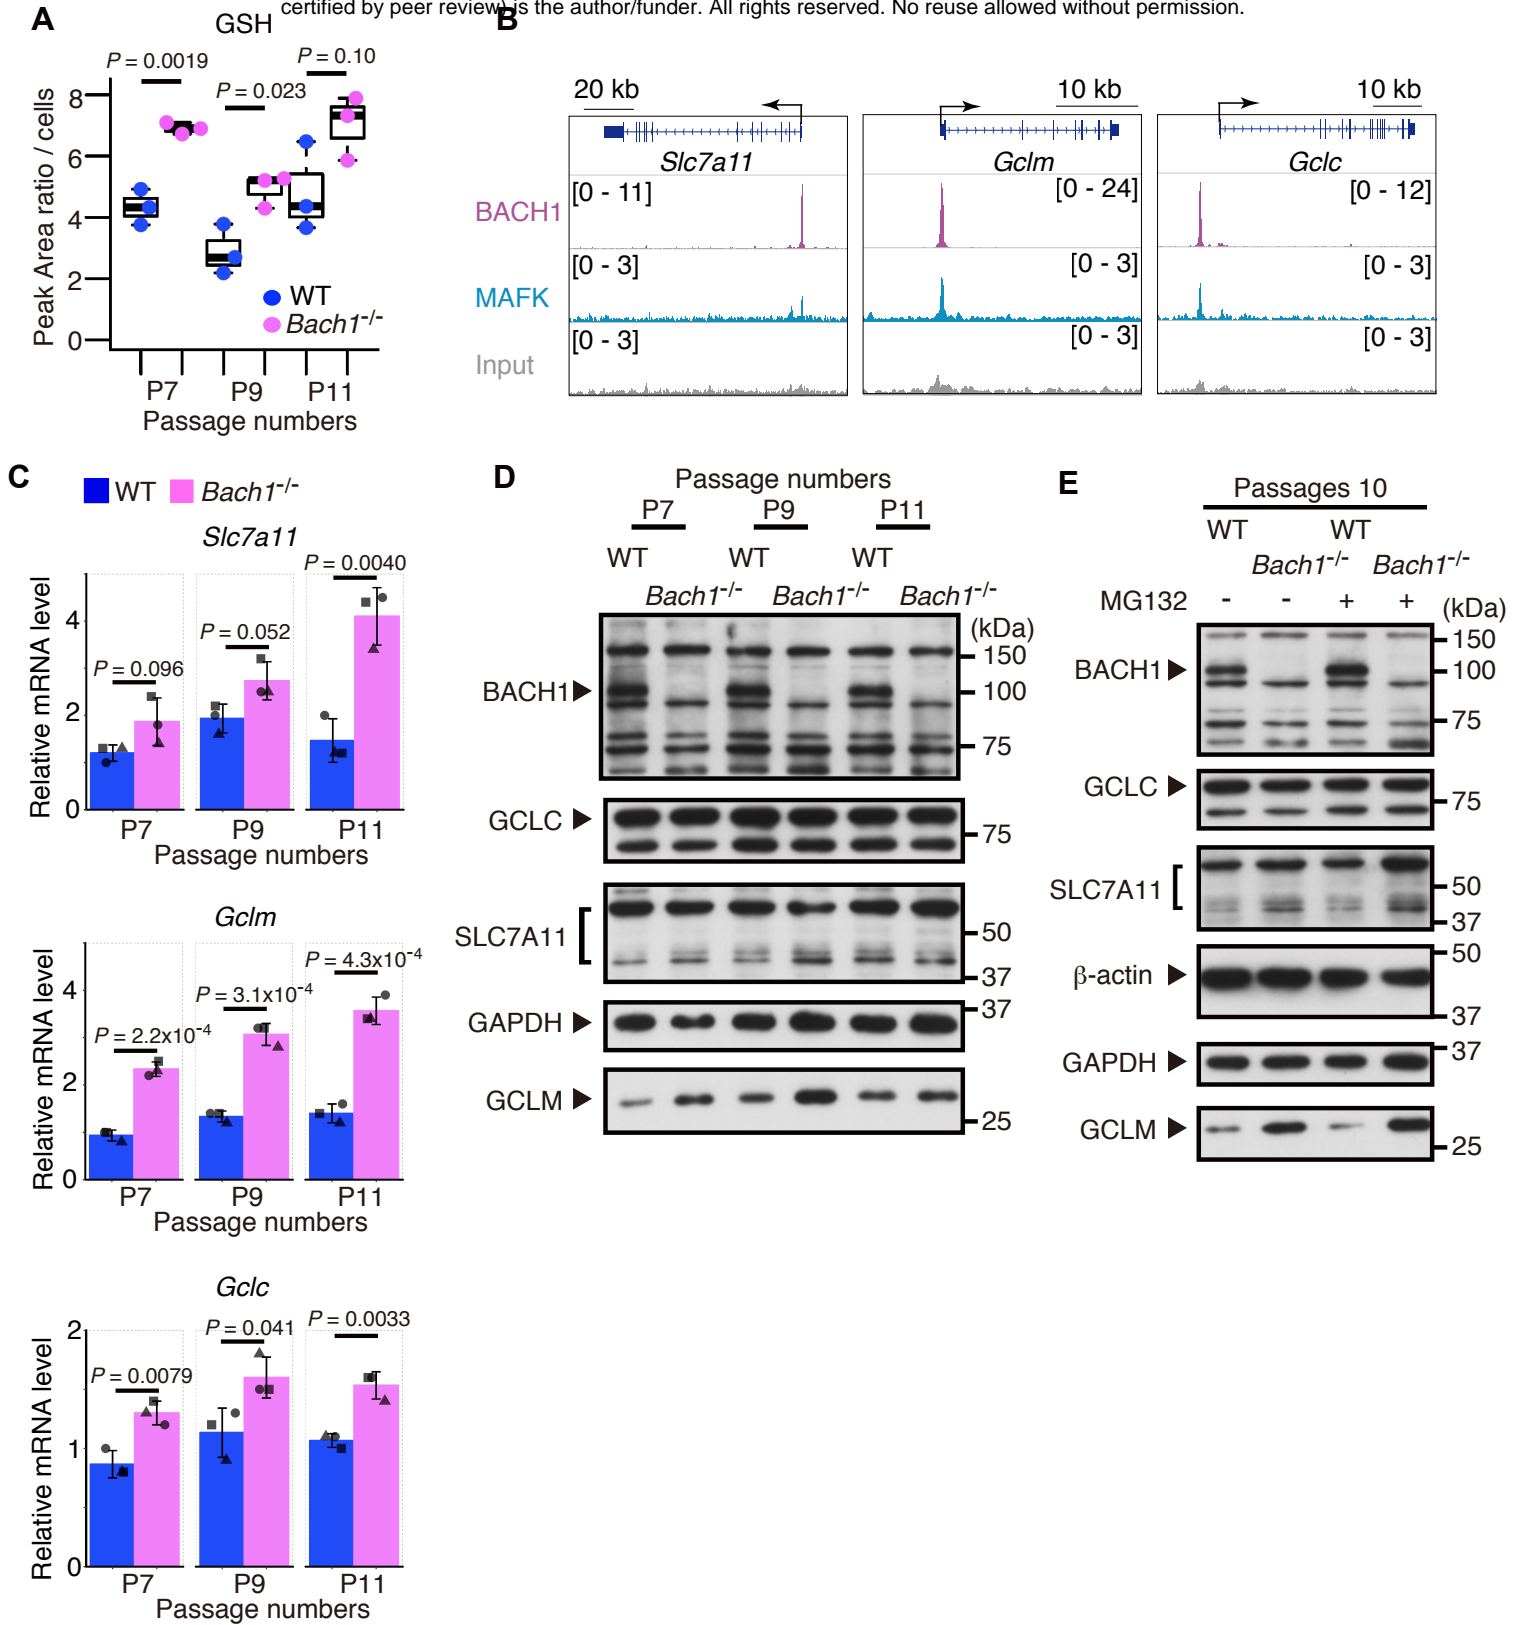

bioRxiv preprint doi: <https://doi.org/10.1101/644898>; this version posted May 21, 2019. The copyright holder for this preprint (which was not certified by peer review) is the author/funder. All rights reserved. No reuse allowed without permission.

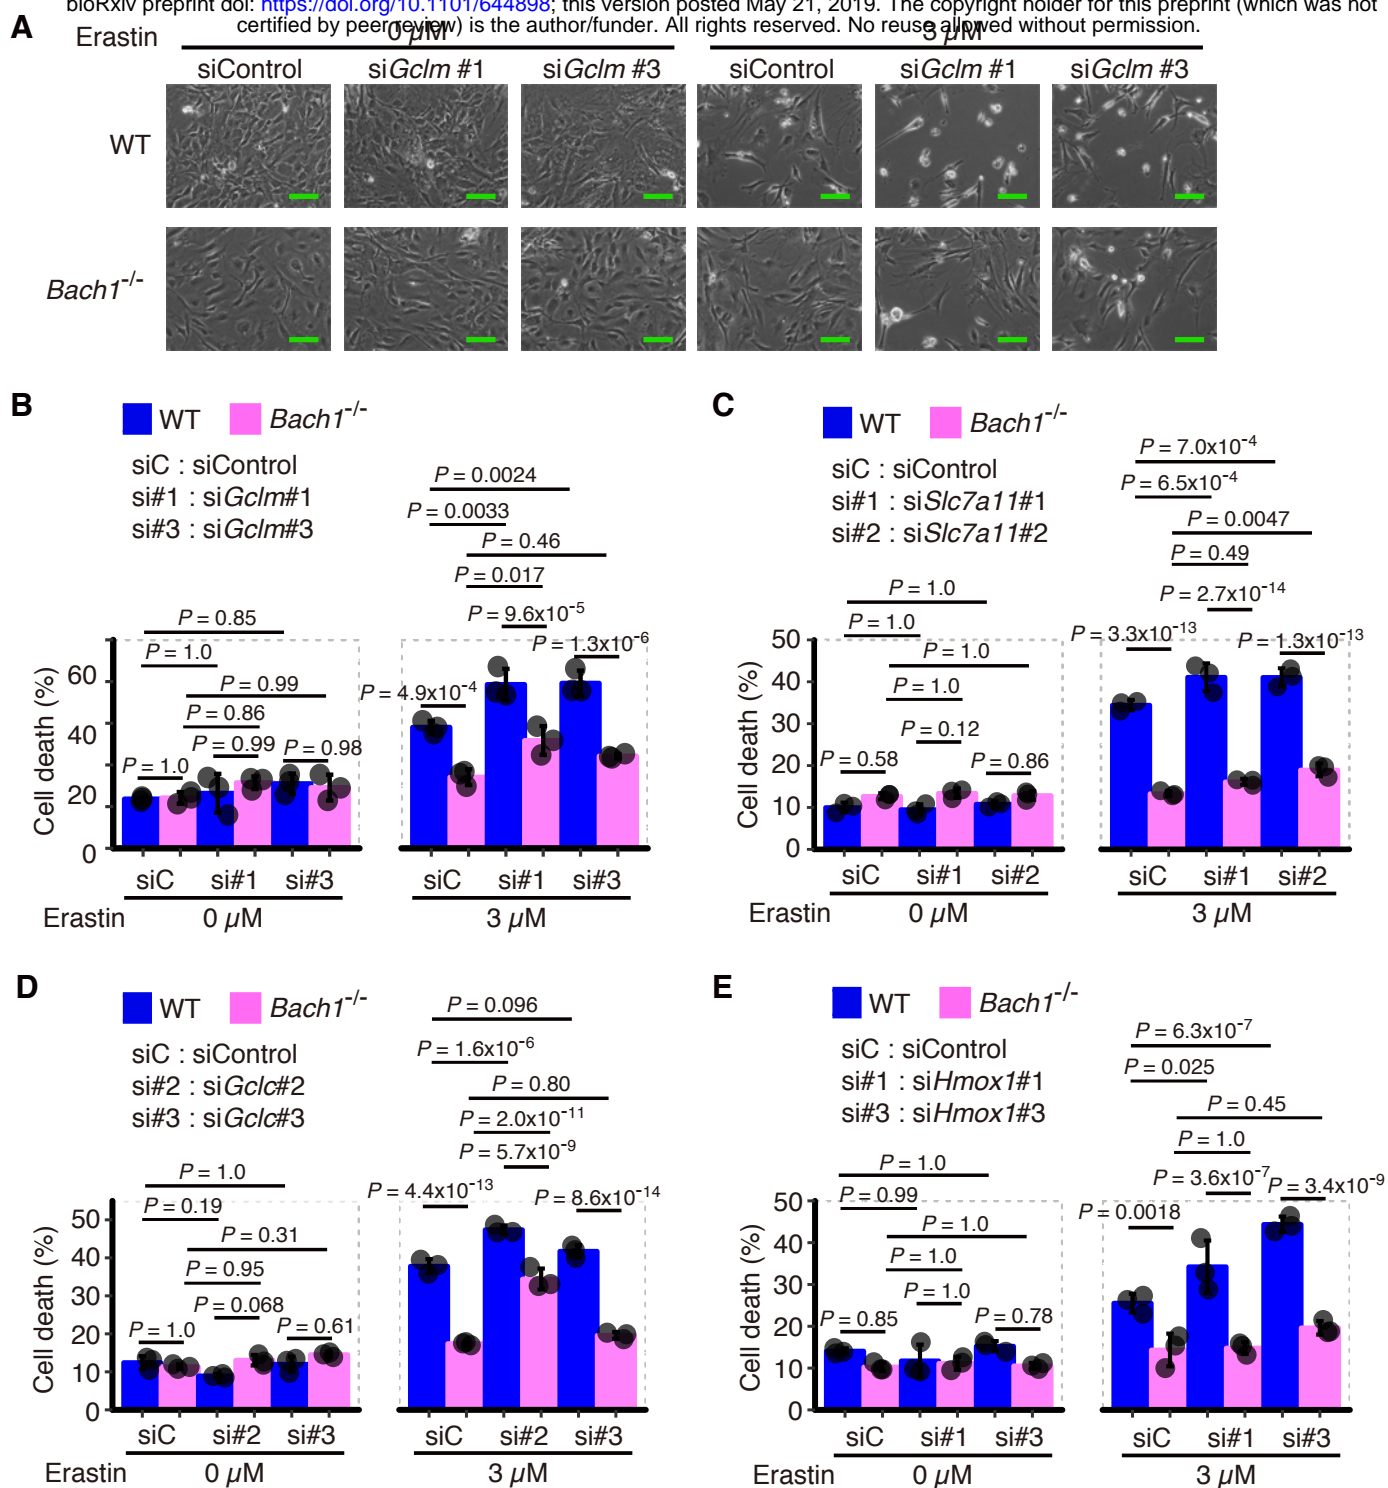

**Figure 5**

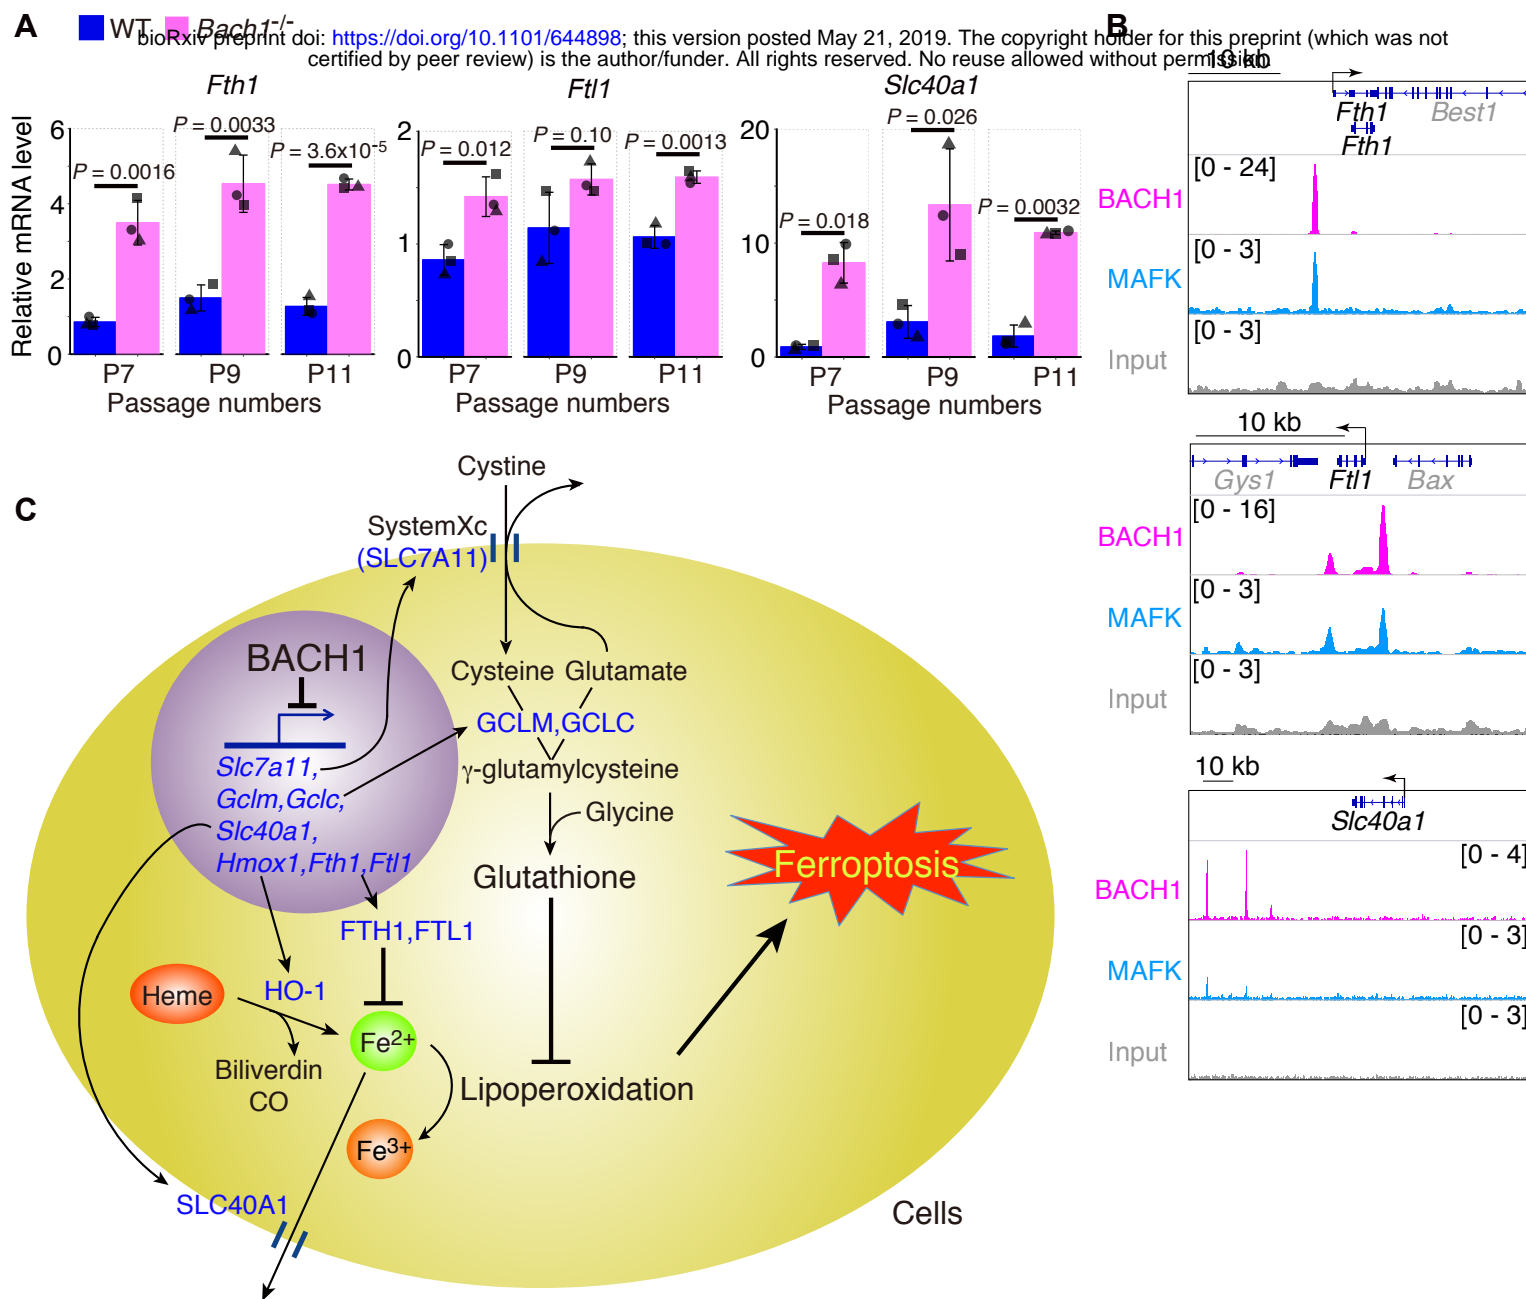



**Figure 6**

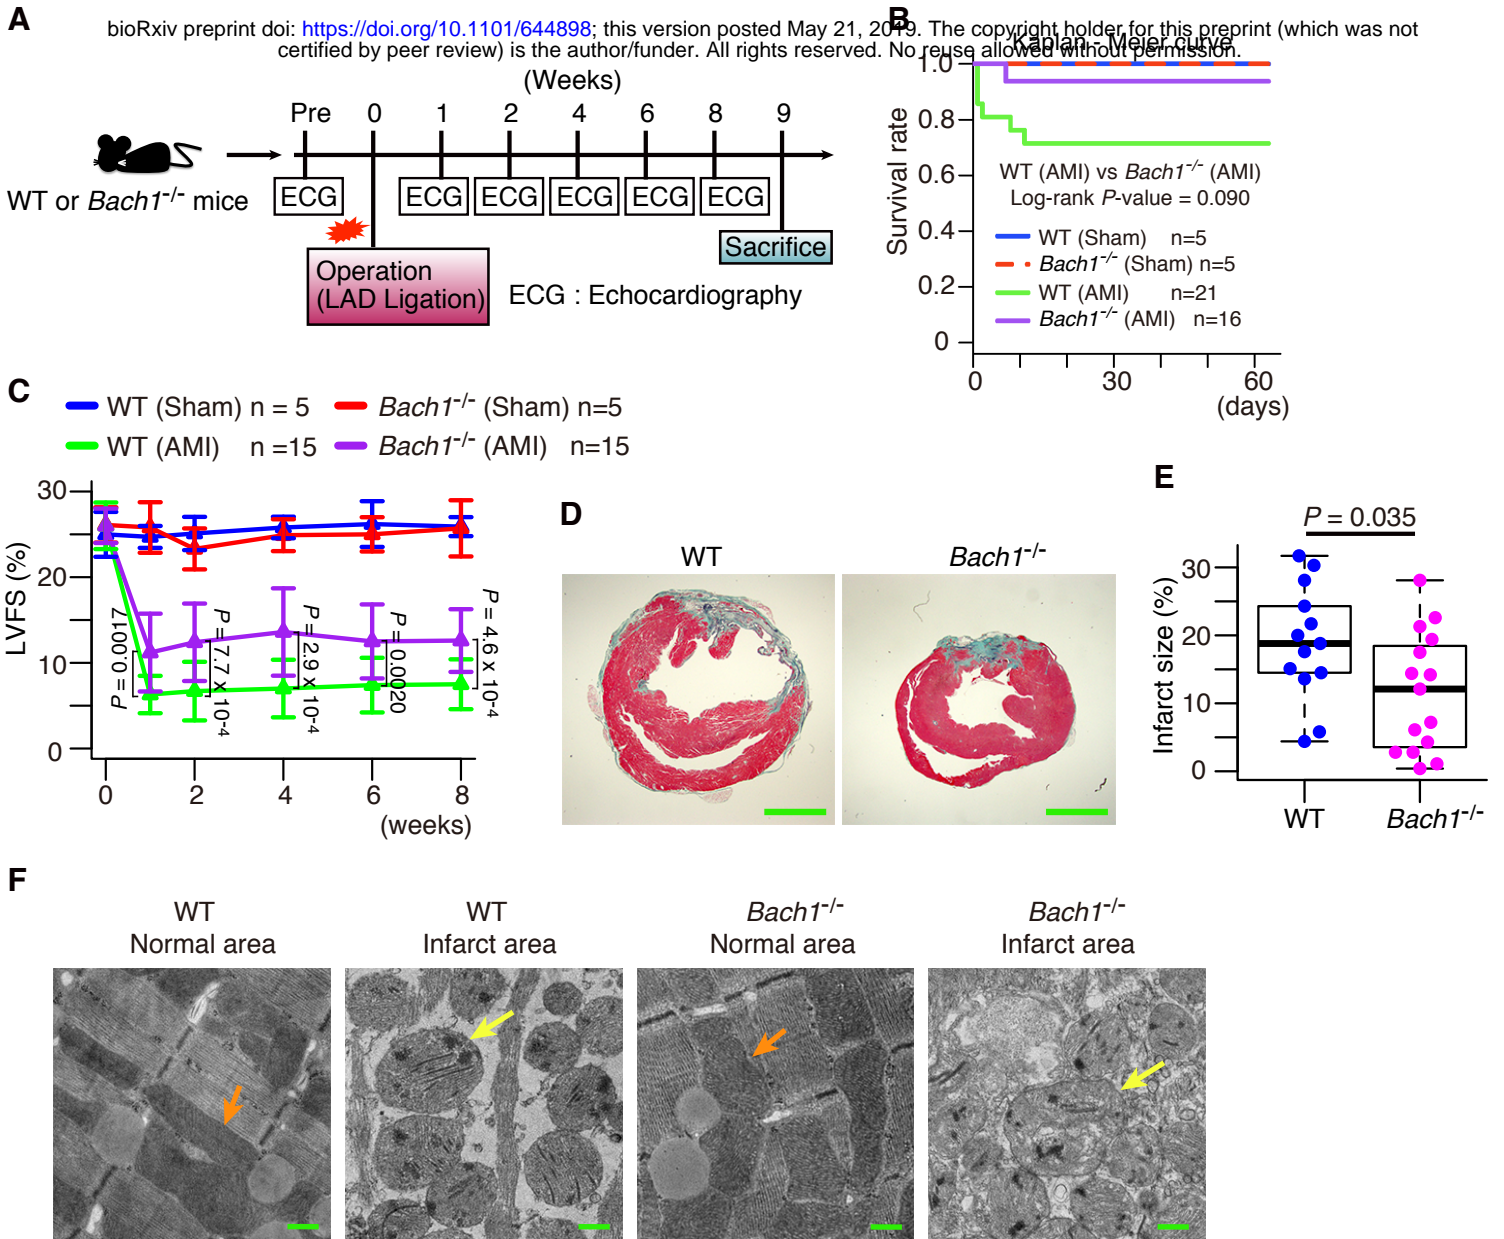

**Figure 7**

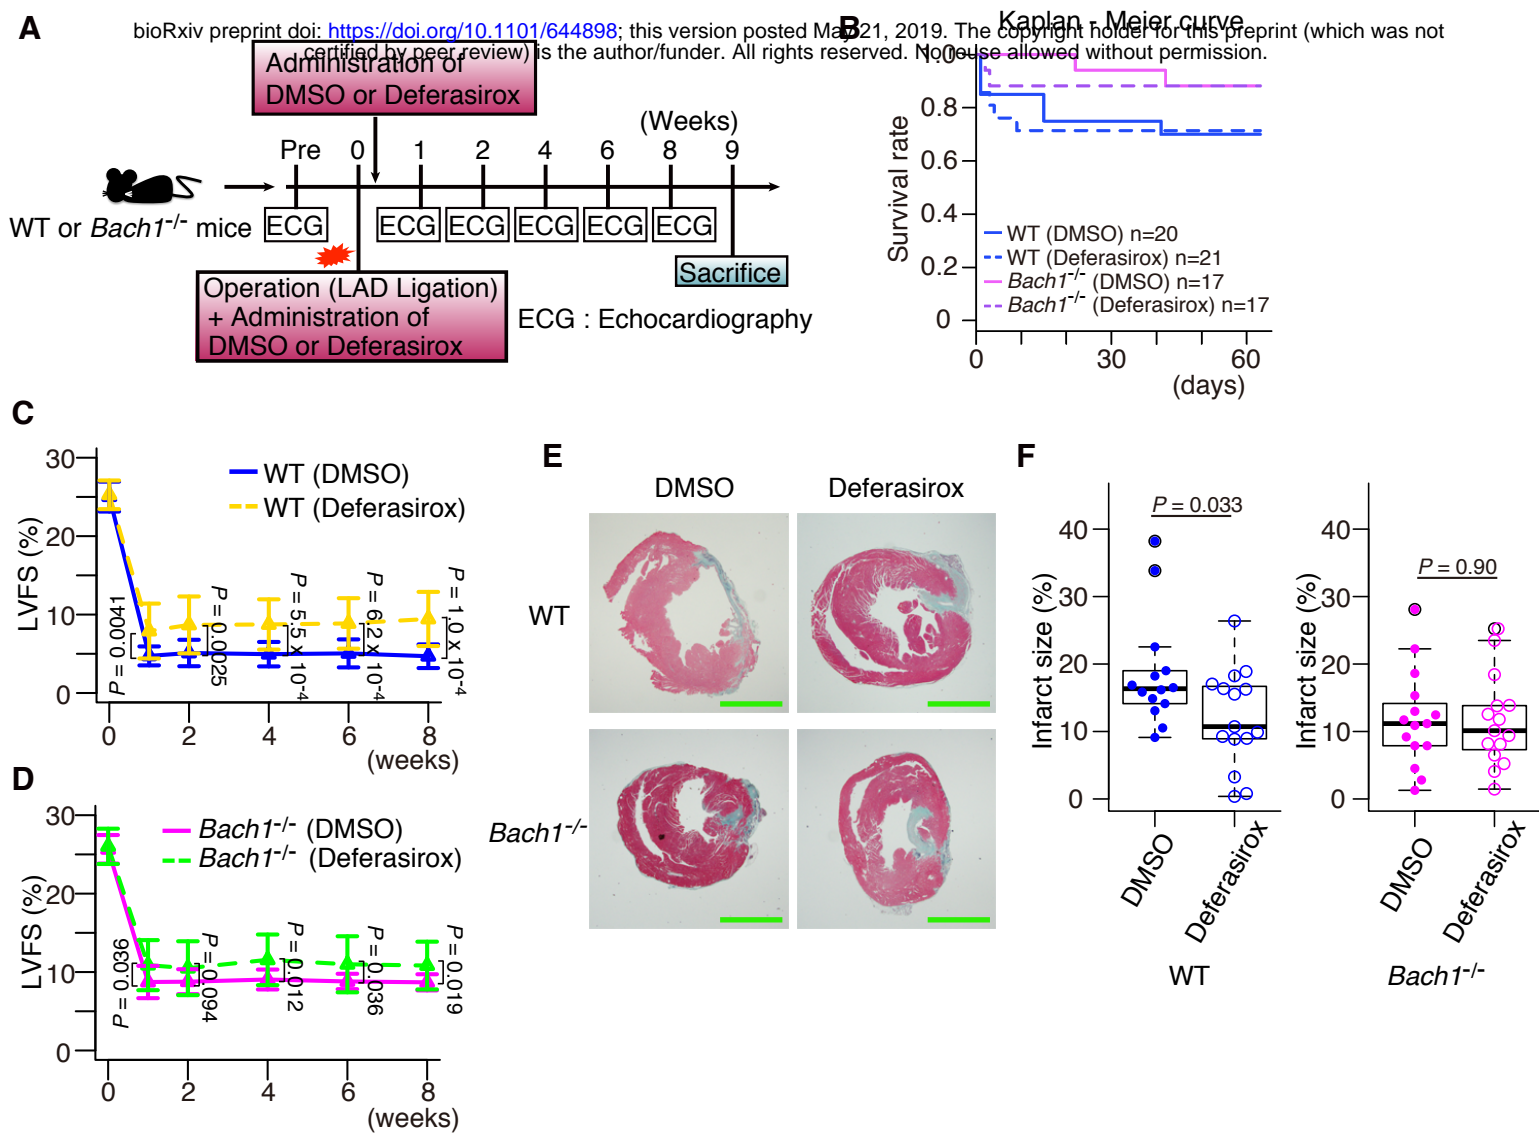

bioRxiv preprint doi: <https://doi.org/10.1101/644898>; this version posted May 21, 2019. The copyright holder for this preprint (which was not certified by peer review) is the author/funder. All rights reserved. No reuse allowed without permission.

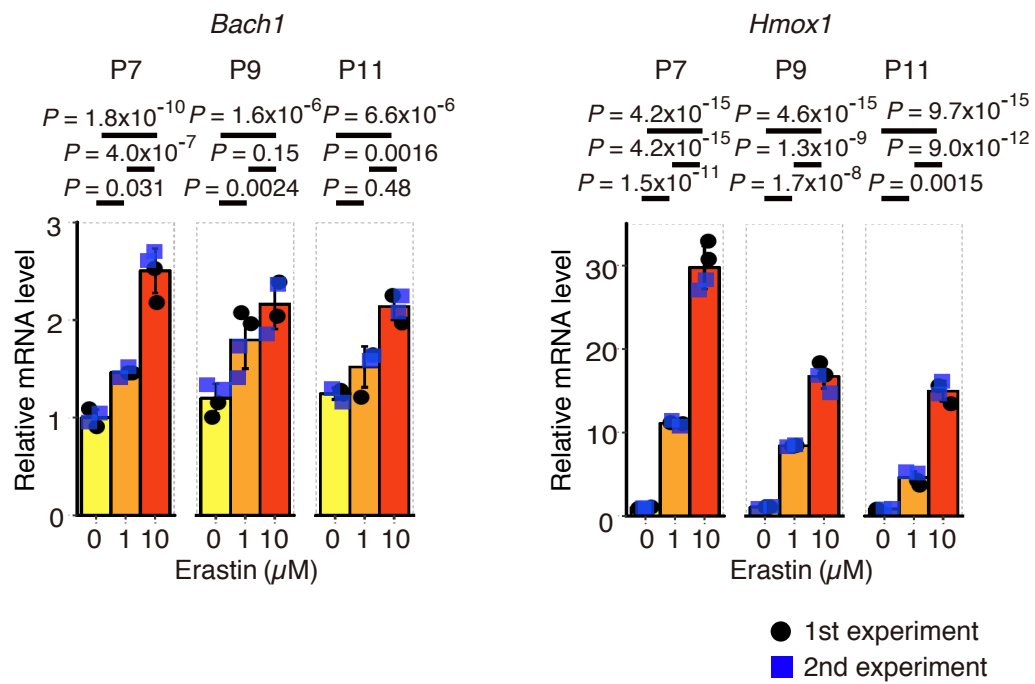

bioRxiv preprint doi: <https://doi.org/10.1101/644898>; this version posted May 21, 2019. The copyright holder for this preprint (which was not certified by peer review) is the author/funder. All rights reserved. No reuse allowed without permission.

WT, Erastin 0  $\mu$ M

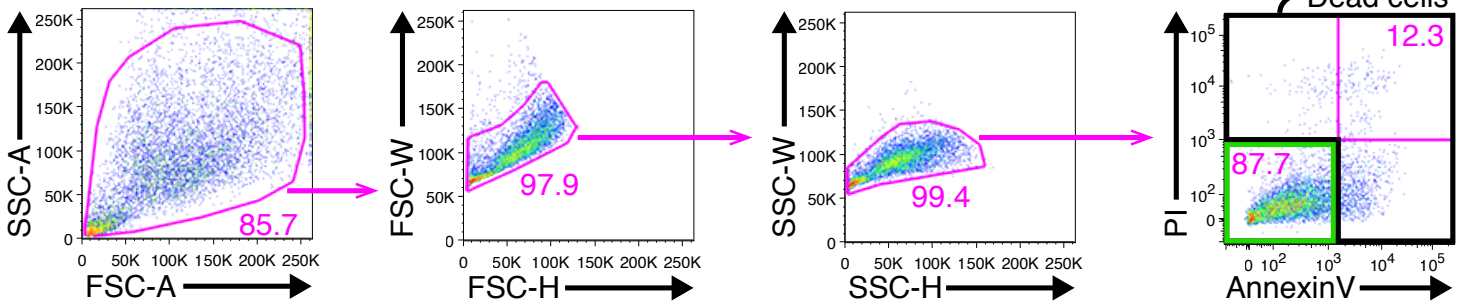

*Bach1*<sup>-/-</sup>, Erastin 0  $\mu$ M

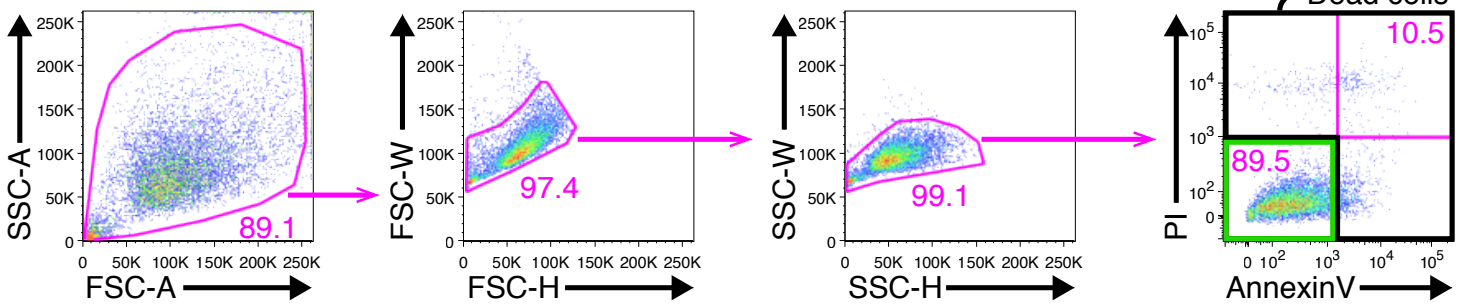

WT, Erastin 3  $\mu$ M

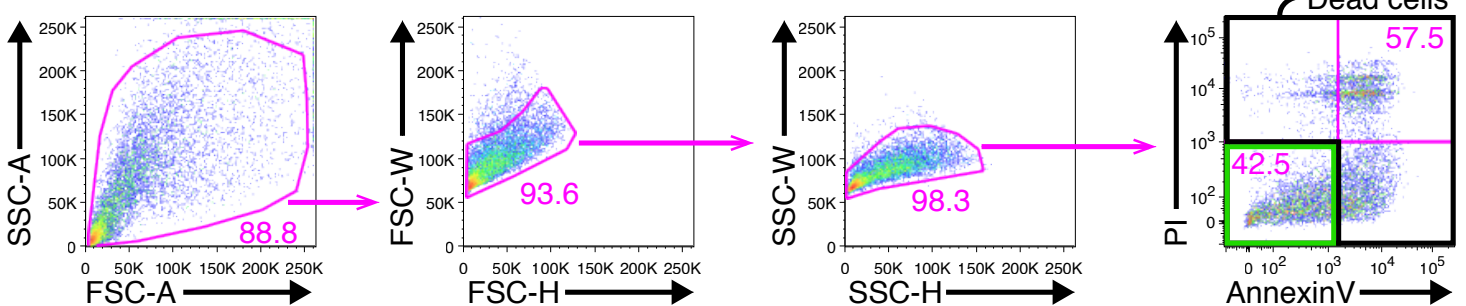

*Bach1*<sup>-/-</sup>, Erastin 3  $\mu$ M

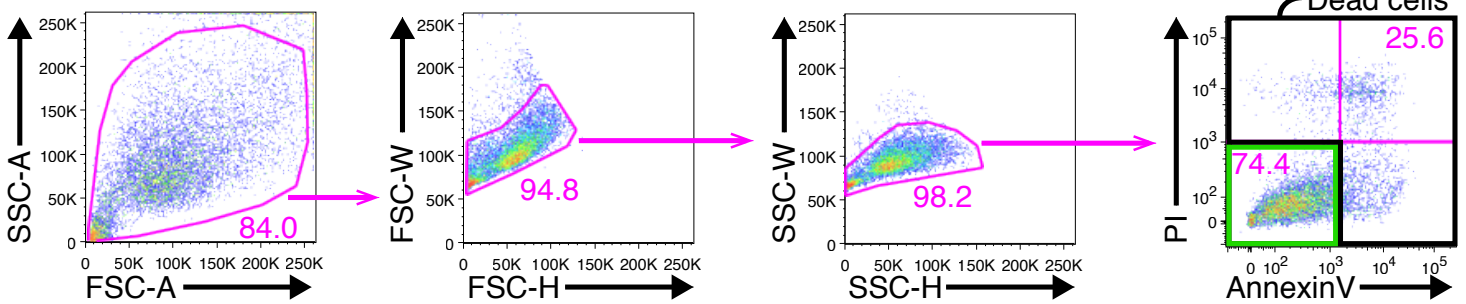

bioRxiv preprint doi: <https://doi.org/10.1101/644898>; this version posted May 21, 2019. The copyright holder for this preprint (which was not certified by peer review) is the author/funder. All rights reserved. No reuse allowed without permission.

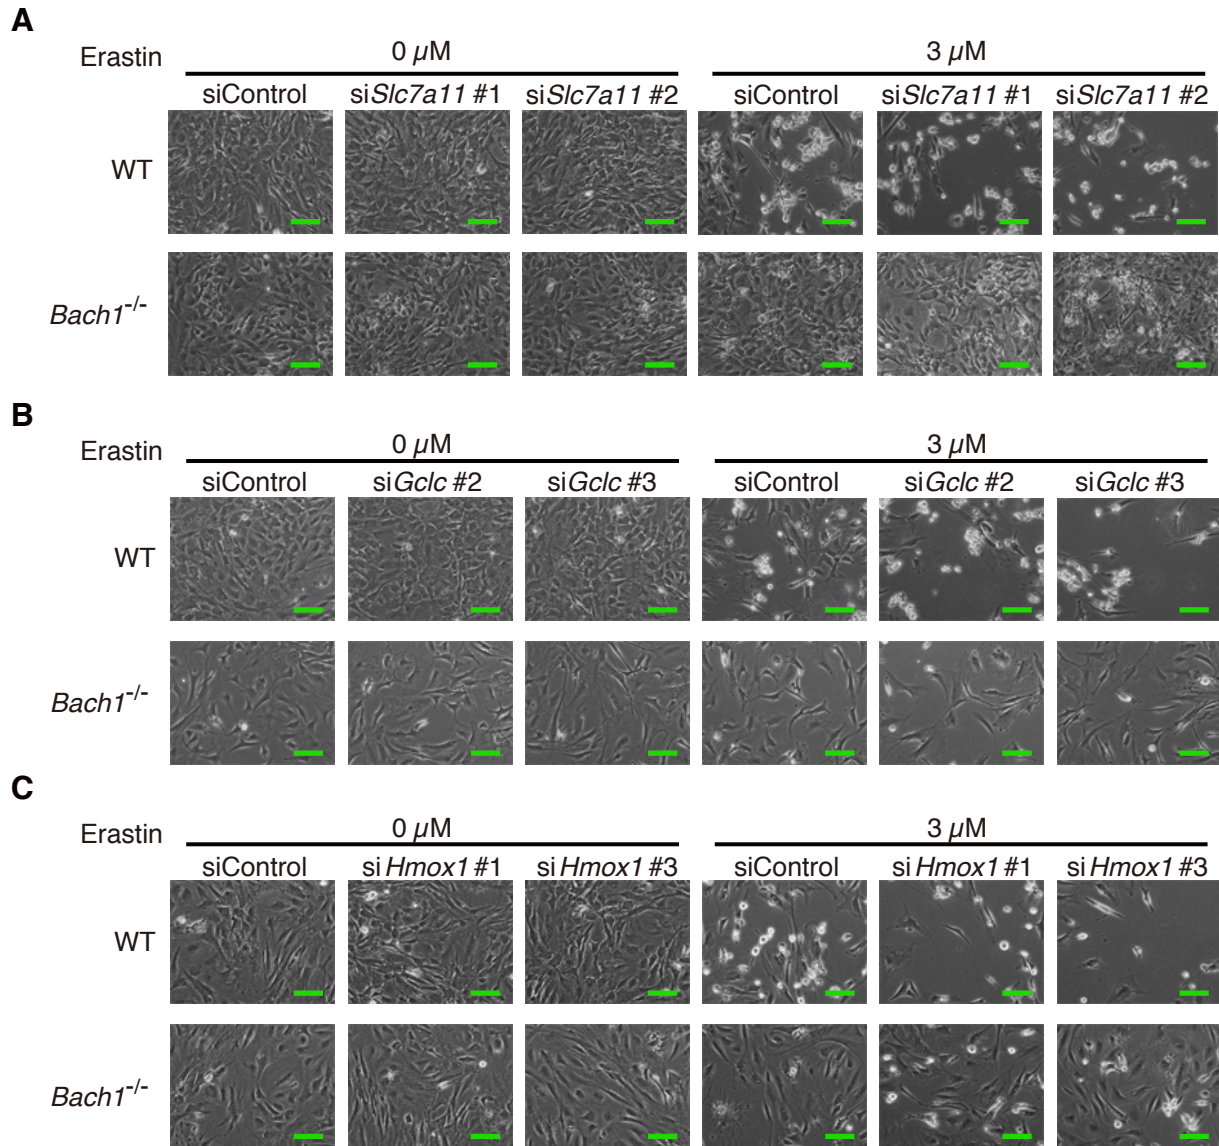

A

bioRxiv preprint doi: <https://doi.org/10.1101/644898>; this version posted May 21, 2019. The copyright holder for this preprint (which was not certified by peer review) is the author/funder. All rights reserved. No reuse allowed without permission.

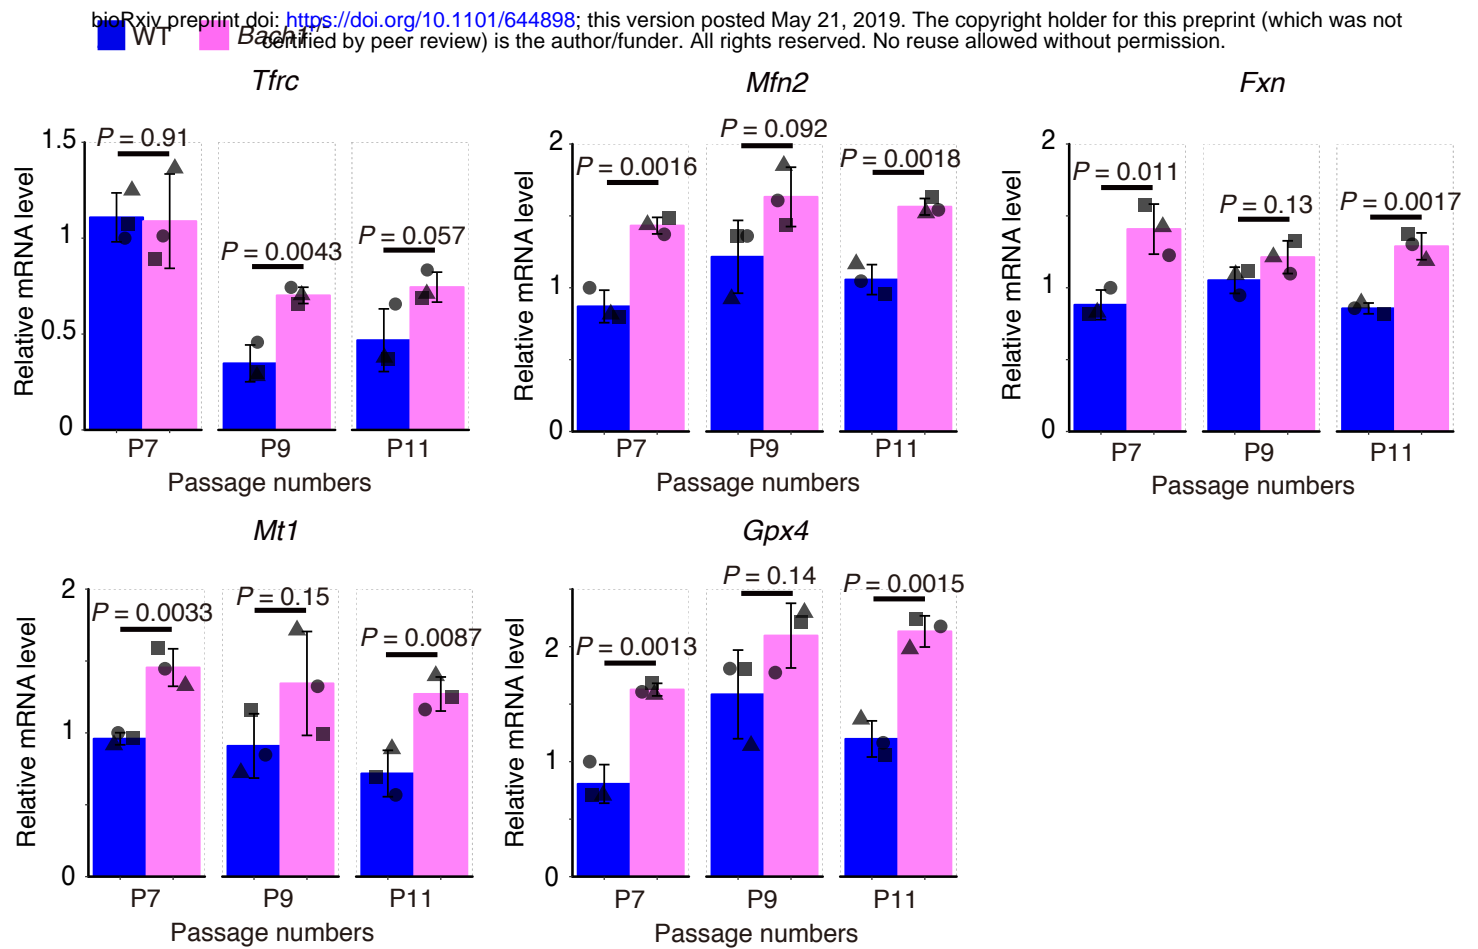

B

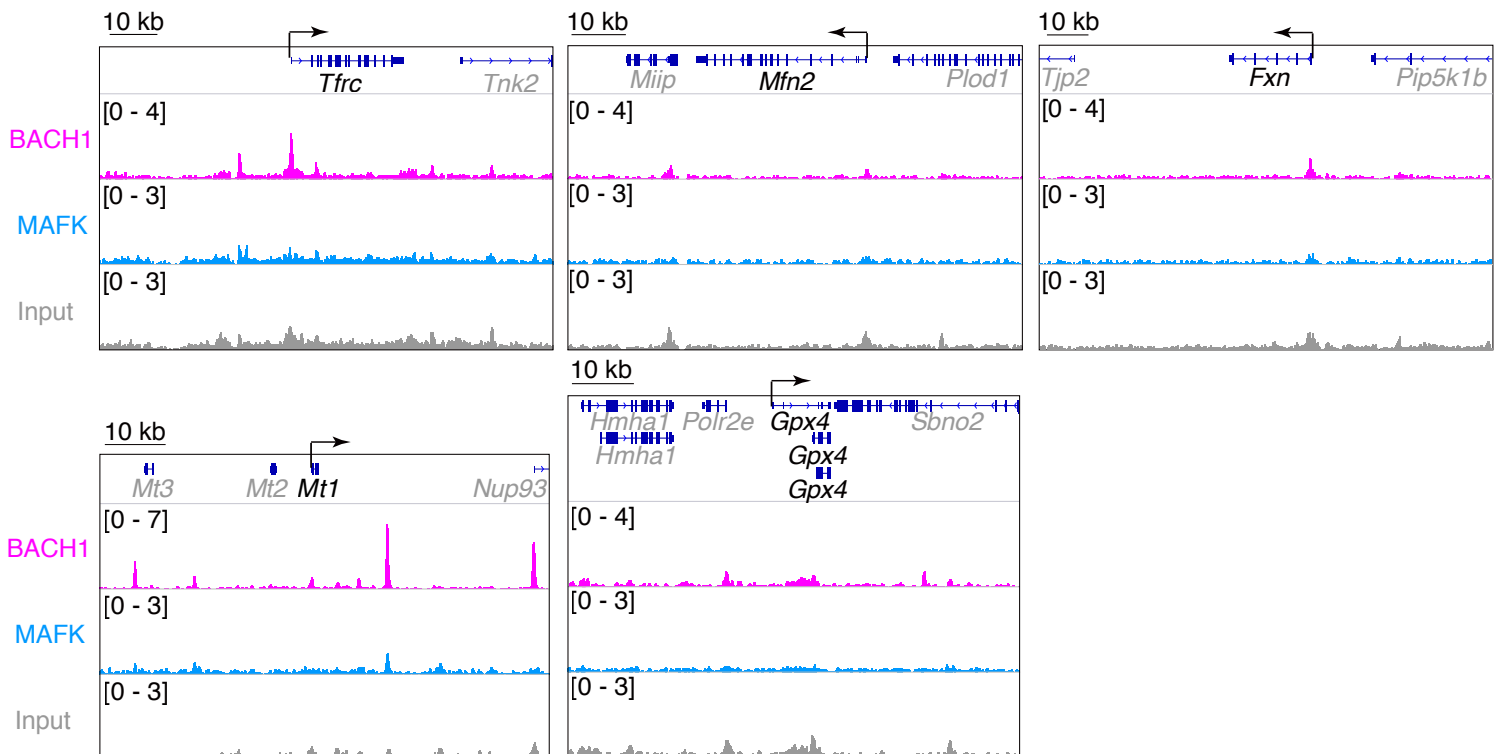

**Figure EV5**

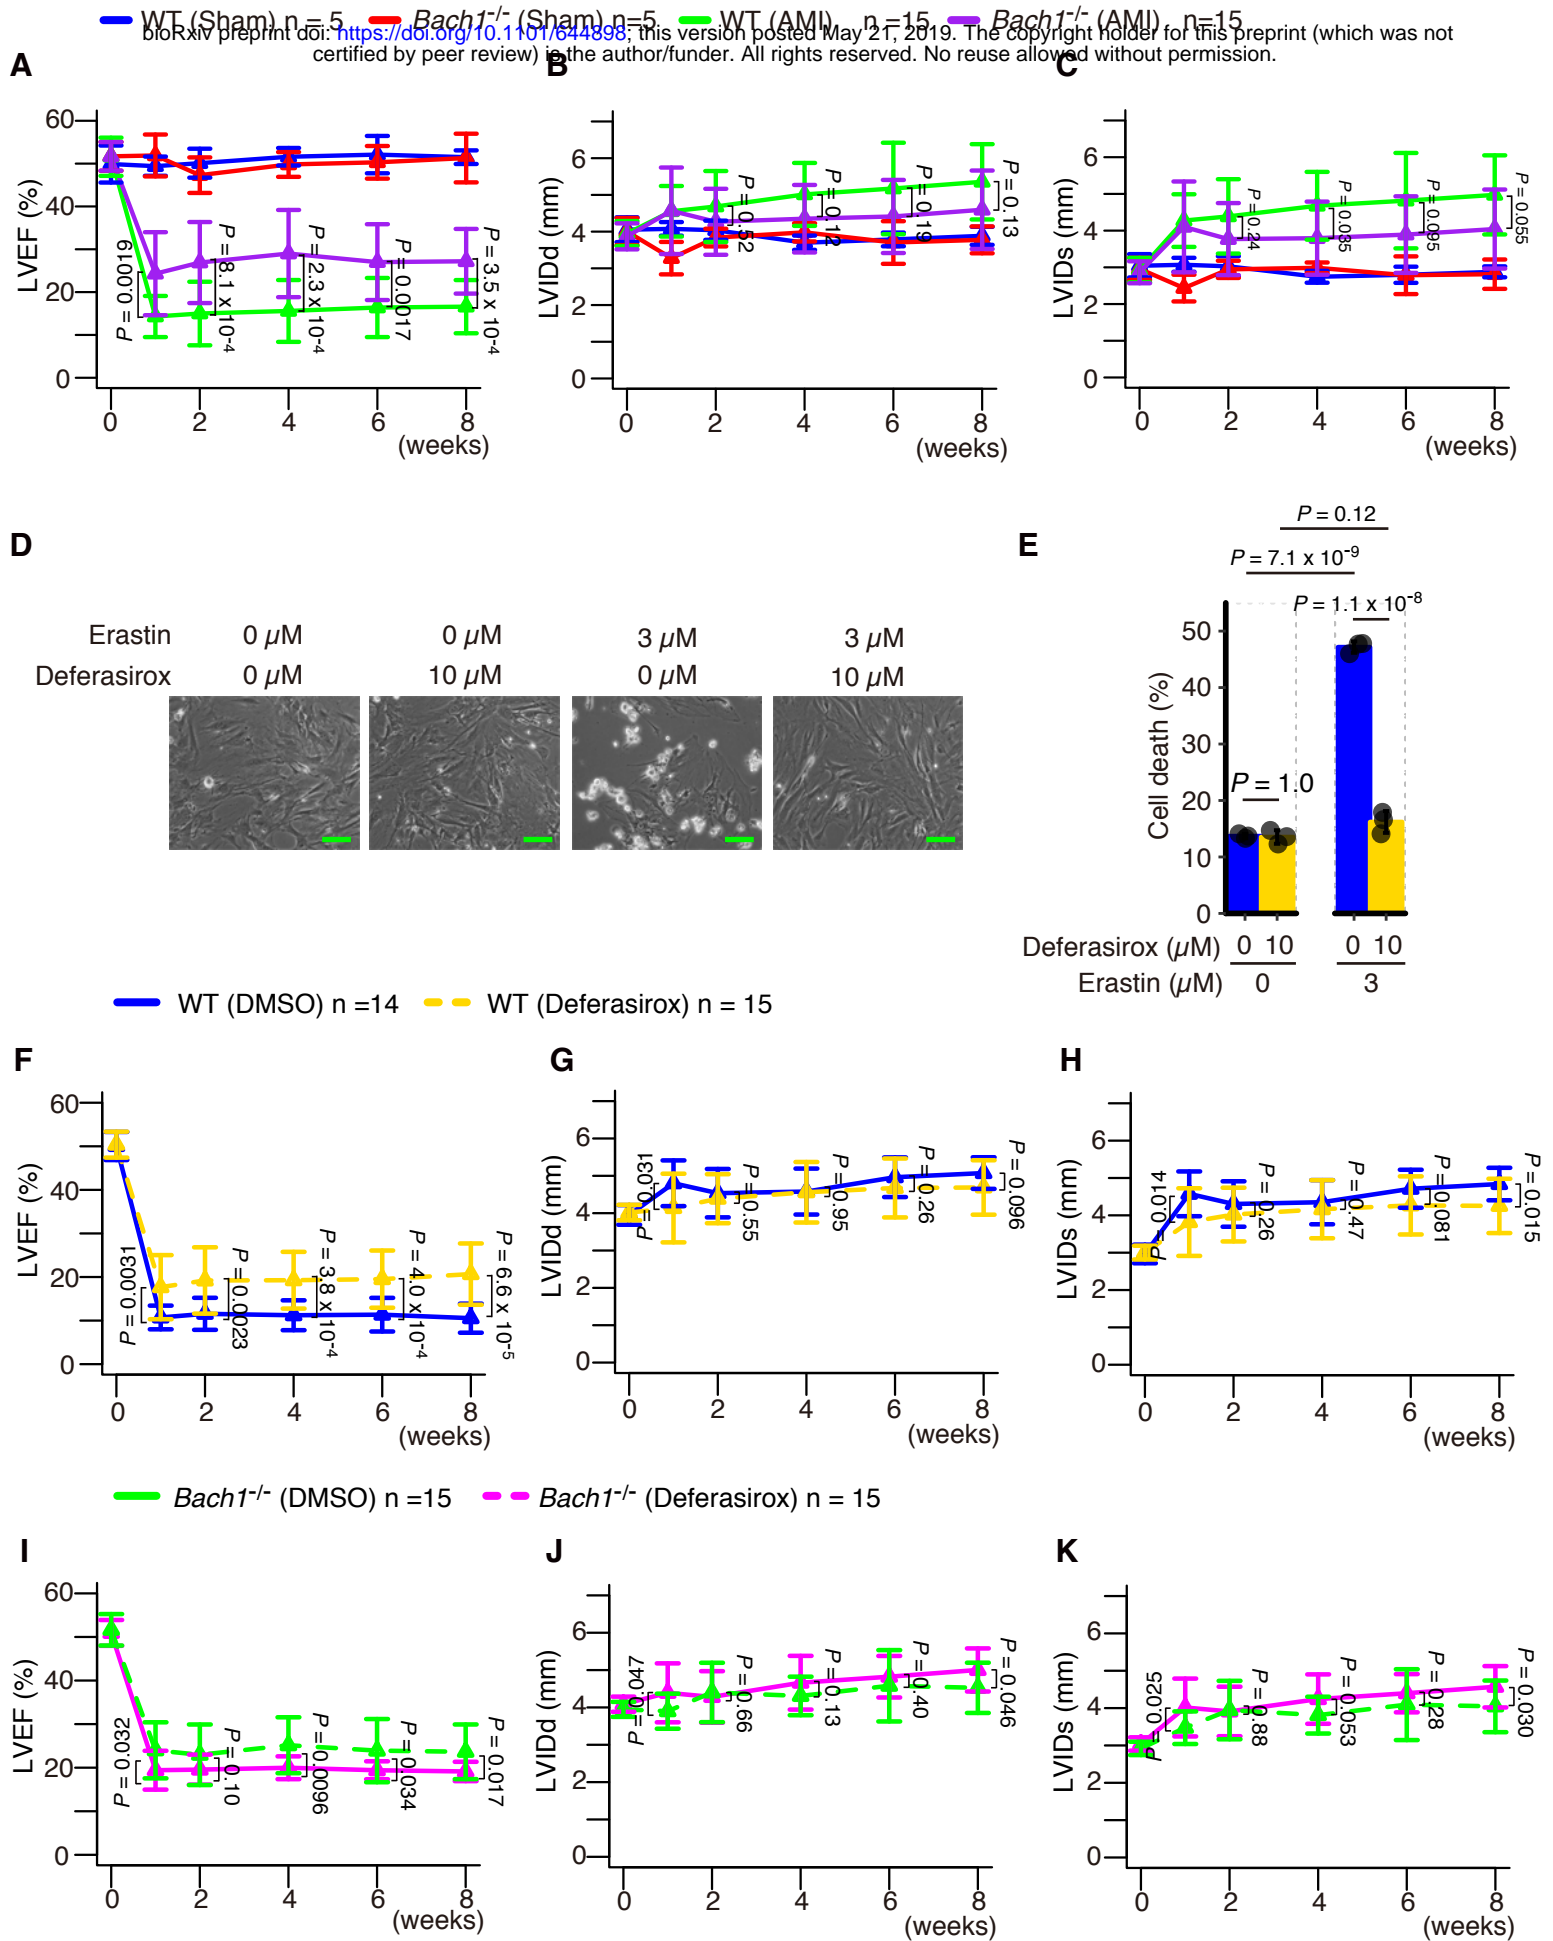

Source: https://biorxiv.org/content/biorxiv/early/2019/05/21/644898.full-text.pdf
